# Supplementary material for: Benzenesulfonamide decorated dihydropyrimidin(thi)ones: carbonic anhydrase profiling and antiproliferative activity
Source: Royal Society of Chemistry journal article supplement (doi:10.1039/d4md00101j), 2024-01-01
Supplement: d4md00101j1.pdf [file d4md00101j1.pdf]

## ESI

# Benzenesulfonamide Decorated Dihydropyrimidin(thi)ones: Carbonic Anhydrase Profiling and Antiproliferative Activity

Hakan Aslan,<sup>a,b\*</sup> Gioele Renzi,<sup>b</sup> Andrea Angeli,<sup>b</sup> Ilaria D'Agostino,<sup>b,c\*</sup> Roberto Ronca,<sup>d</sup> Maria Luisa Massardi,<sup>d</sup> Camilla Tavani,<sup>d</sup> Simone Carradori,<sup>e</sup> Marta Ferraroni,<sup>f</sup> Paolo Governa,<sup>g</sup> Fabrizio Manetti,<sup>g</sup> Fabrizio Carta,<sup>b\*</sup> and Claudiu T. Supuran<sup>b</sup>

<sup>a</sup> Department of Chemistry, Faculty of Science and Arts, Sinop University, Sinop, Turkey

<sup>b</sup> NEUROFARBA Department, Sezione di Scienze Farmaceutiche, University of Florence, 50019, Sesto Fiorentino, Florence, Italy

<sup>c</sup> Department of Pharmacy, University of Pisa, 56126, Pisa, Italy

<sup>d</sup> Department of Molecular and Translational Medicine, University of Brescia, 25123 Brescia, Italy

<sup>e</sup> Department of Pharmacy, "G. d'Annunzio" University of Chieti-Pescara, 66100 Chieti, Italy

<sup>f</sup> Department of Chemistry "Ugo Schiff", University of Florence, 50019, Sesto Fiorentino, Florence, Italy

<sup>g</sup> Department of Biotechnology, Chemistry and Pharmacy, University of Siena, 53100, Siena, Italy

## Content List

|                                                                               |     |
|-------------------------------------------------------------------------------|-----|
| Chemistry .....                                                               | S2  |
| Synthesis of 4-formyl benzenesulfonamide <b>1</b> .....                       | S2  |
| Synthesis of formyl ketoesters <b>7-8</b> and amido derivative <b>9</b> ..... | S2  |
| Heat Map for Selectivity Indexes .....                                        | S3  |
| Electron density maps of inhibitor <b>12a</b> .....                           | S4  |
| Chemistry - Experimental.....                                                 | S6  |
| Procedure for the synthesis of formyl benzenesulfonamide <b>1</b> .....       | S6  |
| Procedure for the synthesis of ketoesters <b>7</b> and <b>8</b> .....         | S6  |
| Procedure for the synthesis of 2-aminopyrimidine <b>23</b> .....              | S7  |
| NMR spectra of final compounds .....                                          | S8  |
| References.....                                                               | S28 |

## Chemistry

### Synthesis of 4-formyl benzenesulfonamide **1**

4-Formyl benzenesulfonamide **1** was obtained through a two-step synthetic pathway (**Scheme S1**) starting from the commercially available 4-cyanobenzenesulfonyl chloride that was converted into sulfonamide **24** by reaction with aqueous ammonia.(1) Then, the cyano group was converted into aldehyde through selective reduction by Raney Nickel.(2)

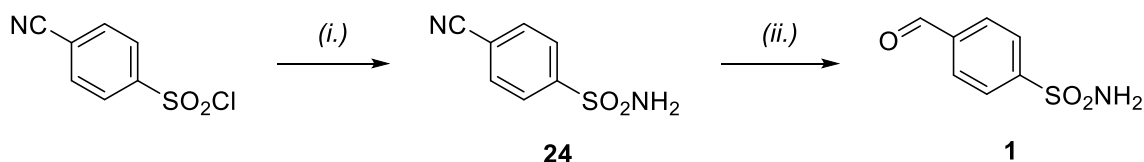

### Scheme S1. Synthesis of 4-formyl benzenesulfonamide **1**.

*Reagents and conditions:* i)  $\text{NH}_4\text{OH}$ , dry THF,  $0^\circ\text{C}$ -r.t., 5 h; ii) Ni Raney, HCOOH, ref., 3 h.

### Synthesis of formyl ketoesters **7-8** and amido derivative **9**

Ketoesters **7** and **8** were synthesized by reacting the suitable benzoyl chloride and EtOAc in presence of LDA as previously reported (**Scheme S2**).<sup>(3)</sup>

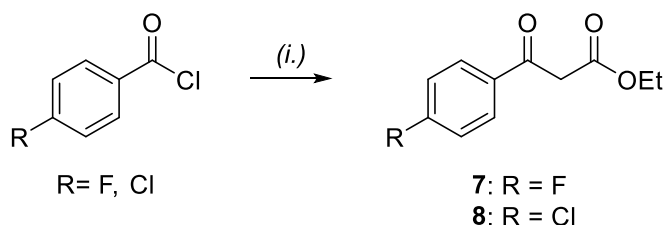

### Scheme S2. Synthesis of ketoesters **7** and **8**.

*Reagents and conditions:* i) LDA, EtOAc, THF,  $-78^\circ\text{C}$ , 2.5 h.

Derivative **9** was obtained by adding  $\text{H}_2\text{SO}_4$  to the commercial 3-phenyl-3-oxopropanenitrile (**Scheme S3**).<sup>(4)</sup>

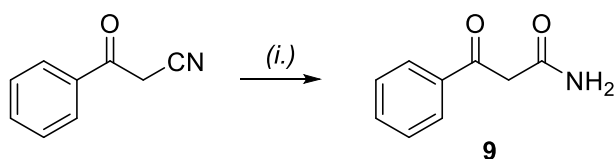

### Scheme S3. Synthesis of amido derivative **9**.

*Reagents and conditions:* i)  $\text{H}_2\text{SO}_4$ , r.t., 16 h.

## Heat Map for Selectivity Indexes

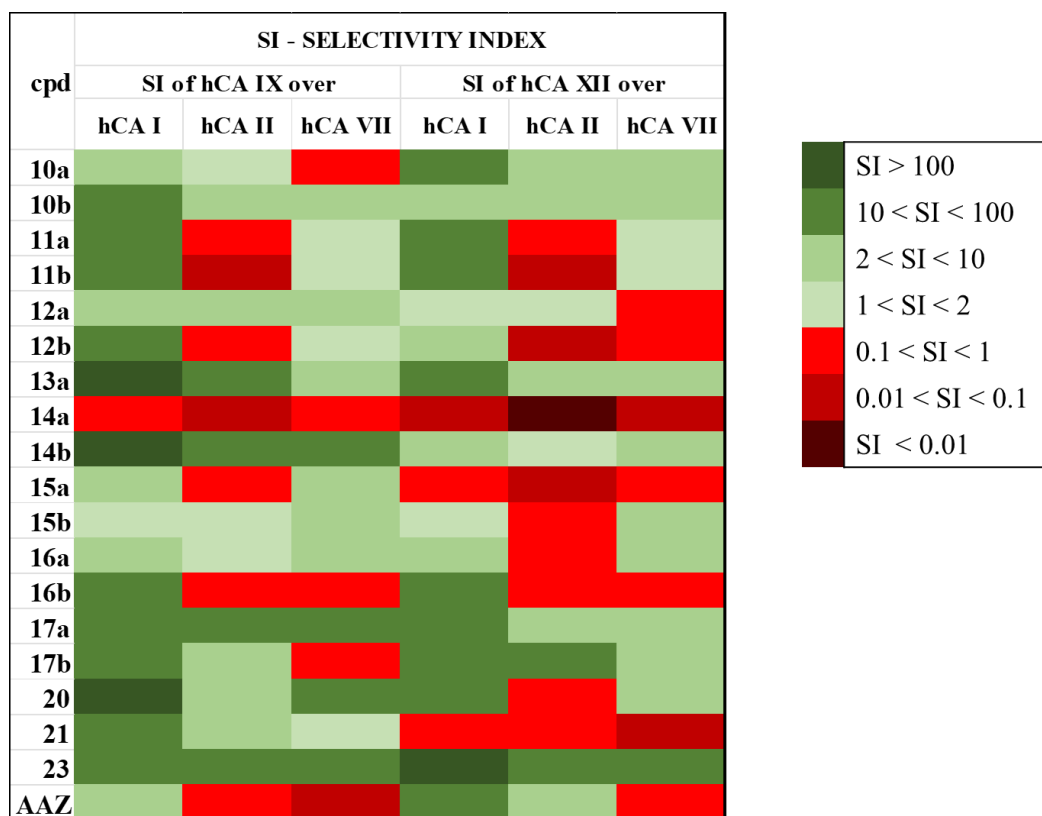

**Figure S1.** Heat Map for Selectivity Indexes of enzymatic inhibition. Selectivity index (SI) is calculated as the ratio between the  $K_i$  value of the test compound on the off-target isoform and that on the referred isoform (*e.g.*, SI of hCA IX over hCA I is calculated as follow:  $K_i$  on hCA I /  $K_i$  on hCA IX).

## Electron density maps of inhibitor 12a

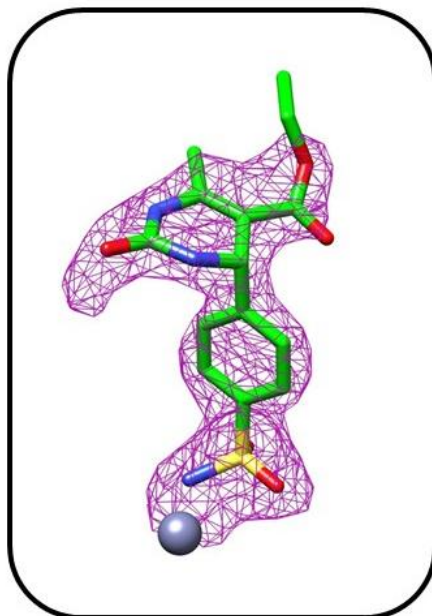

**Figure S2.** Electron density of inhibitor **12a** bound to zinc (grey) in hCA I active site. 2Fo-Fc maps and contoured to the 1.0  $\sigma$  level.

**Table S1.** Summary of data collection and atomic model refinement statistics for hCAI.

|                                                         | <b>hCA I + 12a</b>                        |
|---------------------------------------------------------|-------------------------------------------|
| PDB ID                                                  | 8QGV                                      |
| Wavelength (Å)                                          | 0.9718                                    |
| Space Group                                             | P212121                                   |
| Unit cell (a, b, c, $\alpha$ , $\beta$ , $\gamma$ ) (Å) | 62.94, 71.14, 120.92, 90.00, 90.00, 90.00 |
| Limiting resolution (Å)                                 | 50.0-1.84 (1.84-1.88)                     |
| Unique reflections                                      | 48159 (3513)                              |
| Rmerge (%)                                              | 12.2 (176.2)                              |
| Rmeas (%)                                               | 12.7 (183.5)                              |
| Redundancy                                              | 12.76 (12.8)                              |
| Completeness overall (%)                                | 100.0 (100.0)                             |
| $\langle I/\sigma(I) \rangle$                           | 22.21 (2.28)                              |
| CC (1/2)                                                | 99.9 (78.1)                               |
| <b>Refinement statistics</b>                            |                                           |
| Resolution range (Å)                                    | 50.0-1.84                                 |
| Rfactor (%)                                             | 19.78                                     |
| Rfree (%)                                               | 24.03                                     |
| r.m.s.d. bonds (Å)                                      | 0.0097                                    |
| r.m.s.d. angles (°)                                     | 1.6577                                    |
| <b>Ramachandran statistics (%)</b>                      |                                           |
| Most favored                                            | 97.4                                      |
| additionally allowed                                    | 2.6                                       |
| outlier regions                                         | 0.0                                       |
| <b>Average B factor (Å<sup>2</sup>)</b>                 |                                           |
| All atoms                                               | 34.334                                    |
| inhibitors                                              | 38.500                                    |
| solvent                                                 | 35.482                                    |

## Chemistry - Experimental

### Procedure for the synthesis of 4-formyl benzenesulfonamide 1.

**4-Cyanobenzenesulfonamide (24).** 4-Cyanobenzenesulfonyl chloride (10 mmol) was dissolved in dry THF (40 mL). Then, an aqueous solution of ammonium hydroxide (30%) (4 mL) was added at 0 °C and the mixture was stirred at room temperature for 5 h. Then, the mixture was extracted with EtOAc three times. The combined organic layers were washed with H<sub>2</sub>O, dried over anhydrous Na<sub>2</sub>SO<sub>4</sub>, filtered, and evaporated under *vacuum*. The obtained solid was triturated with Et<sub>2</sub>O. No further purification was required. Yield: 94%, white solid. <sup>1</sup>H NMR (400 MHz, DMSO-*d*<sub>6</sub>) δ: 7.69 (2H, s, -NH<sub>2</sub>), 8.02 (2H, d, *J* = 8.4 Hz), 8.12 (2H, d, *J* = 8.4 Hz) ppm.

**4-Formylbenzenesulfonamide (1).** To a solution of **24** (1.7 g, 9.3 mmol) in formic acid (75%, 65 mL), Raney Nickel (2.45 g) was added and the mixture was refluxed for 3 h. Then, it was filtered through a Celite cake. The filtrate was concentrated under vacuum, extracted with EtOAc three times, and washed with H<sub>2</sub>O. The combined organic layers were dried over anhydrous Na<sub>2</sub>SO<sub>4</sub>, filtered, and evaporated under *vacuum*. No further purification was required. Yield: 80 %, beige solid. <sup>1</sup>H NMR (400 MHz, DMSO-*d*<sub>6</sub>) δ: 7.64 (2H, s, -NH<sub>2</sub>), 8.06 (2H, d, *J* = 8.4 Hz), 8.14 (2H, d, *J* = 8.4 Hz), 10.13 (1H, s) ppm.

### Procedure for the synthesis of ketoesters 7 and 8.

To a flame-dried flask containing LDA solution (5 mL, 2.0 M in heptane, THF, ethylbenzene) at -78 °C, EtOAc (0.49 mL, 5 mmol) was added dropwise and the mixture was stirred at -78 °C for 30 minutes. Then, the suitable benzoyl chloride (5 mmol) in THF (4 mL) was added and the mixture was stirred at the same temperature for 2 hours. Upon completion, aqueous NH<sub>4</sub>Cl was added and the crude was extracted with EtOAc three times. The combined organic layers were washed with H<sub>2</sub>O and brine, dried over anhydrous Na<sub>2</sub>SO<sub>4</sub>, filtered, and evaporated under *vacuum*. The crude mixture was then purified through flash column chromatography on silica gel by using hexane/EtOAc 1:4 as eluent to give the desired keto-ester as a yellow oil.

**Ethyl 3-(4-fluorophenyl)-3-oxopropanoate (7).** Yield 69 % (keto/enol: 1/0.06); yellow oil. <sup>1</sup>H NMR (400 MHz, DMSO-*d*<sub>6</sub>) δ: Keto: 1.21 (3H, t, *J* = 7.2 Hz), 4.15 (2H, q, *J* = 6.8 Hz), 4.23 (2H, s), 7.42 (2H, t, *J* = 8.8 Hz), 8.08 (2H, t, *J* = 7.2 Hz); Enol: 1.31 (3H, t, *J* = 6.8 Hz), 4.07 (2H, q, *J* = 7.2 Hz), 5.99 (1H, bs), 7.39 (2H, t, *J* = 8.8 Hz), 7.98 (2H, t, *J* = 6.8 Hz), 12.70 (1H, bs) ppm.

**Ethyl 3-(4-chlorophenyl)-3-oxopropanoate (8).** Yield 65 % (keto/enol: 1/0.1); yellow oil. <sup>1</sup>H NMR (400 MHz, DMSO-*d*<sub>6</sub>) δ: Keto: 1.21 (3H, t, *J* = 7.2 Hz), 4.15 (2H, q, *J* = 6.8 Hz), 4.24 (2H, s), 7.67 (2H, d,

$J = 8.8$  Hz), 8.01 (2H, d,  $J = 8.8$  Hz); Enol: 1.31 (3H, t,  $J = 7.2$  Hz), 4.07 (2H, q,  $J = 7.2$  Hz), 6.03 (1H, bs), 7.59 (2H, d,  $J = 8.8$  Hz), 7.93 (2H, d,  $J = 8.8$  Hz), 12.64 (1H, bs) ppm.

**3-Oxo-3-phenylpropanamide (9).** 3-Phenyl-3-oxopropanenitrile (725.0 mg, 5.0 mmol) was dissolved in conc.  $\text{H}_2\text{SO}_4$  (25.0 mL) and the mixture was stirred at r.t. for 16 h. Then, the mixture was poured into ice water, basified with  $\text{NH}_4\text{OH}$ , and extracted with EtOAc three times. The combined organic layers were washed with brine, dried over  $\text{MgSO}_4$ , filtered, and evaporated under *vacuum* to provide the desired amide. Yield 71 %; mp: 109-110 °C;  $^1\text{H}$  NMR (400 MHz,  $\text{DMSO}-d_6$ )  $\delta$ : 3.90 (2H, s), 7.15 (1H, bs), 7.64 (1H, bs), 7.58 (2H, t,  $J = 7.6$  Hz), 7.69 (1H, t,  $J = 7.6$  Hz), 8.01 (2H, d,  $J = 7.2$  Hz) ppm.

#### Procedure for the synthesis of 2-aminopyrimidine 23

**(E)-4-(3-phenyl-3-oxoprop-1-en-1-yl)benzenesulfonamide (22).** To an aqueous solution of NaOH (650.0 mg, 6.4 mmol, 3.0 mL), a solution of acetophenone (600.0 mg, 5.0 mmol) in EtOH (5.0 mL) was added slowly at 0 °C. Then, 4-formylbenzenesulfonamide (925.0 mg, 5.0 mmol) in EtOH (5.0 mL) was added dropwise and the mixture was stirred for 16 h at r.t.. After completion, the formed precipitate was filtered under *vacuum* and washed with EtOH and  $\text{H}_2\text{O}$ . Yield 55 %; white solid;  $^1\text{H}$  NMR (400 MHz,  $\text{DMSO}-d_6$ )  $\delta$ : 7.46- 7.52 (3H, m), 7.58 (2H, s,  $-\text{NH}_2$ ), 7.80 (1H, d,  $J = 15.6$  Hz), 7.90- 7.94 (2H, m), 7.96 (1H, d,  $J = 15.6$  Hz), 8.0 (2H, d,  $J = 8.0$  Hz), 8.32 (2H, d,  $J = 8.0$  Hz) ppm; LC-MS (ESI) ( $m/z$ ): 286.1  $[\text{M}-\text{H}]^-$

**4-(2-amino-6-phenylpyrimidin-4-yl)benzenesulfonamide (23).** To a solution of chalcone **22** (287.0 mg, 1.0 mmol) and guanidine hydrochloride (143.2 mg, 1.5 mmol) in EtOH (4.0 mL), 50% aqueous KOH (3.9 mmol) was added and the mixture was stirred till chalcone starting material consumption. Then, 30% aqueous  $\text{H}_2\text{O}_2$  (0.34 mL, 3.34 mmol) was added portionwise over a period of 1 h and the reaction mixture was left to stir. After that, the reaction mixture was concentrated under *vacuum* and  $\text{H}_2\text{O}$  was added to induce precipitation. The solid obtained was filtered under vacuum and washed with additional  $\text{H}_2\text{O}$ . Then, it was recrystallized from EtOH. Yield 45 %; White solid; mp: 259-261°C;  $^1\text{H}$  NMR (400 MHz,  $\text{DMSO}-d_6$ )  $\delta$ : 6.91 (2H, s,  $-\text{NH}_2$ ), 7.52 (2H, s,  $-\text{NH}_2$ ), 7.58 (3H, t,  $J = 3.2$  Hz), 7.84 (1H, s, H-C5), 8.01 (2H, d,  $J = 8.4$  Hz), 8.27 (2H, d,  $J = 3.6$  Hz), 8.44 (2H, d,  $J = 8.4$  Hz) ppm;  $^{13}\text{C}$  NMR (100 MHz,  $\text{DMSO}-d_6$ )  $\delta$ : 103.5 (CH), 127.0 ( $\text{CH}_2$ ), 128.1 ( $\text{CH}_2$ ), 128.6 ( $\text{CH}_2$ ), 129.7 ( $\text{CH}_2$ ), 131.7 (CH), 138.2 (C), 141.5 (C), 146.6 (C), 164.5 (C), 165.1 (C), 166.4 (C) ppm; LC-MS (ESI) ( $m/z$ ): 327.1  $[\text{M}+\text{H}]^+$

# NMR spectra of final compounds

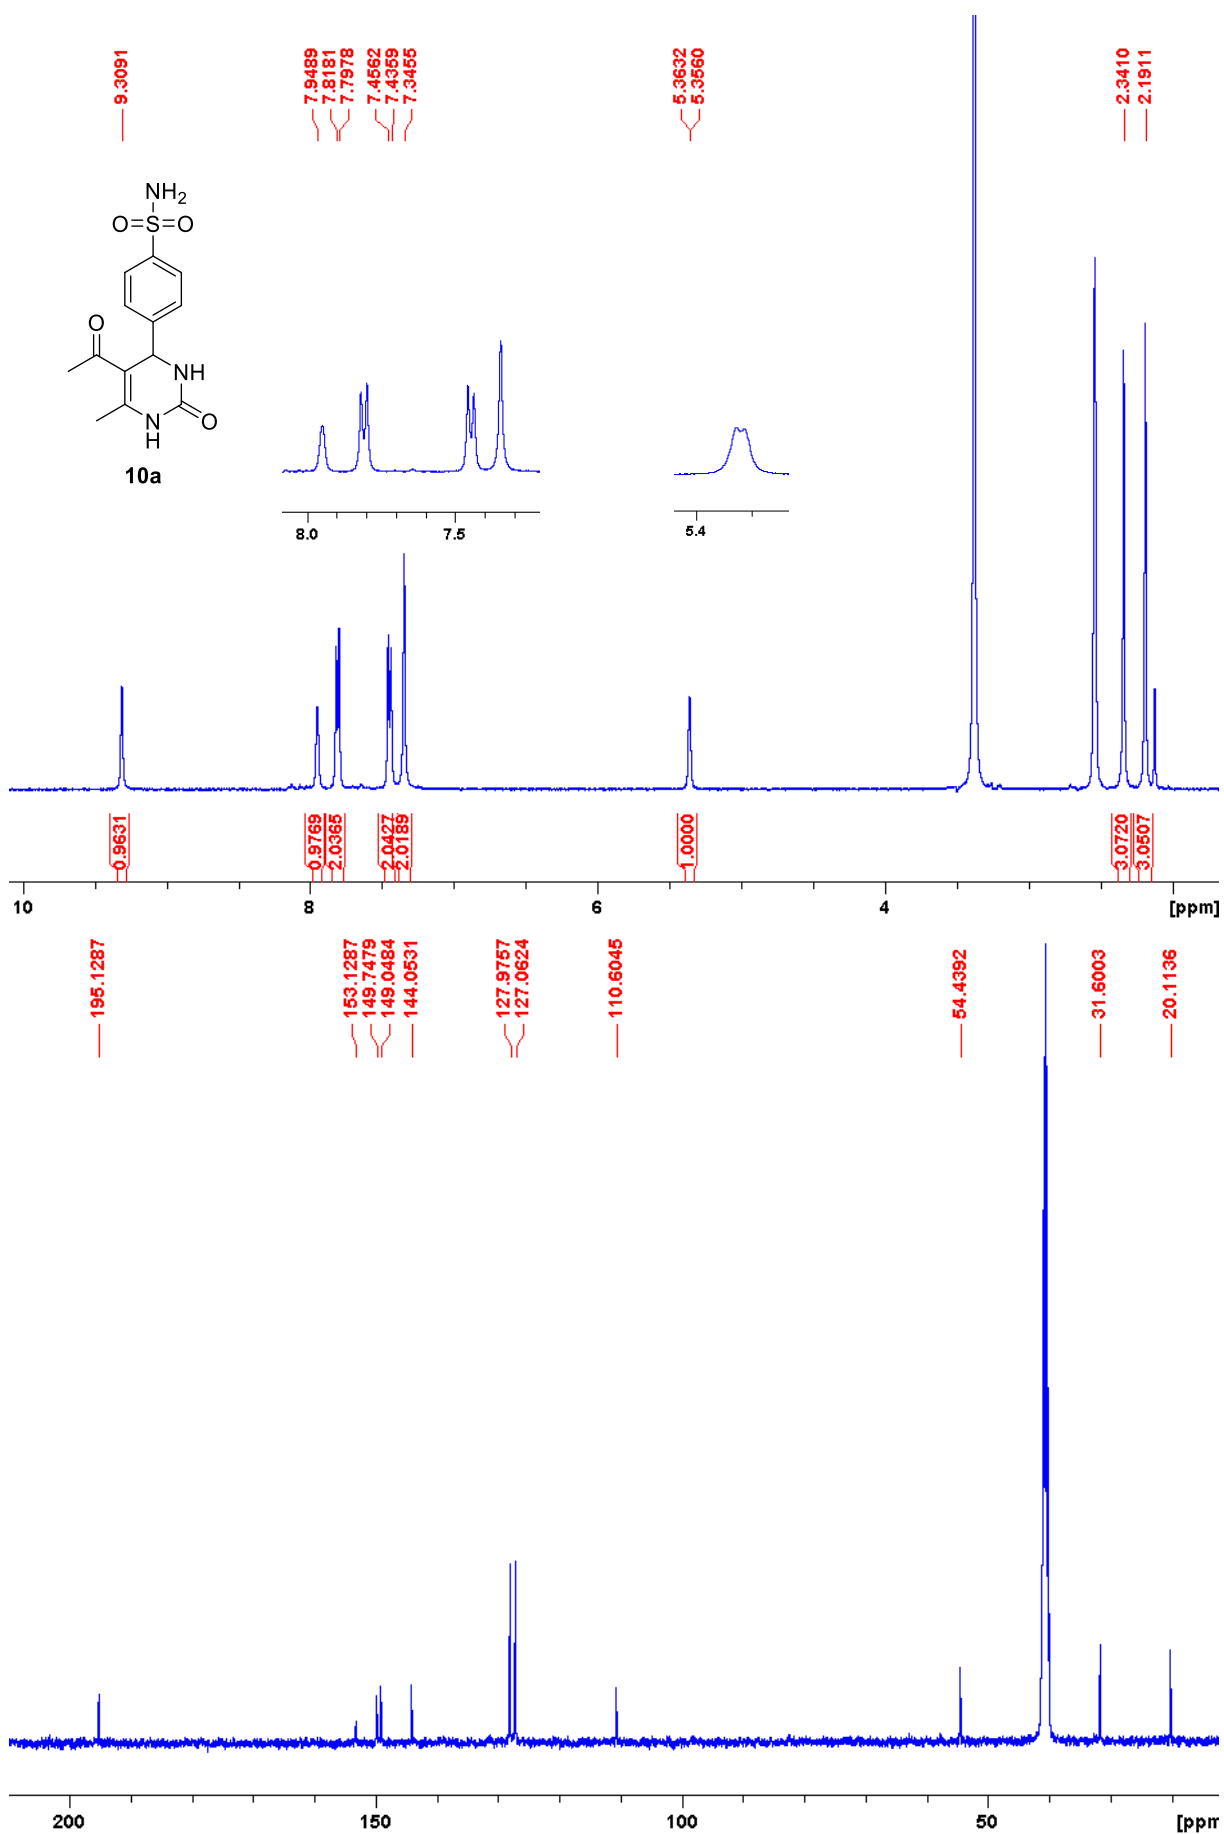



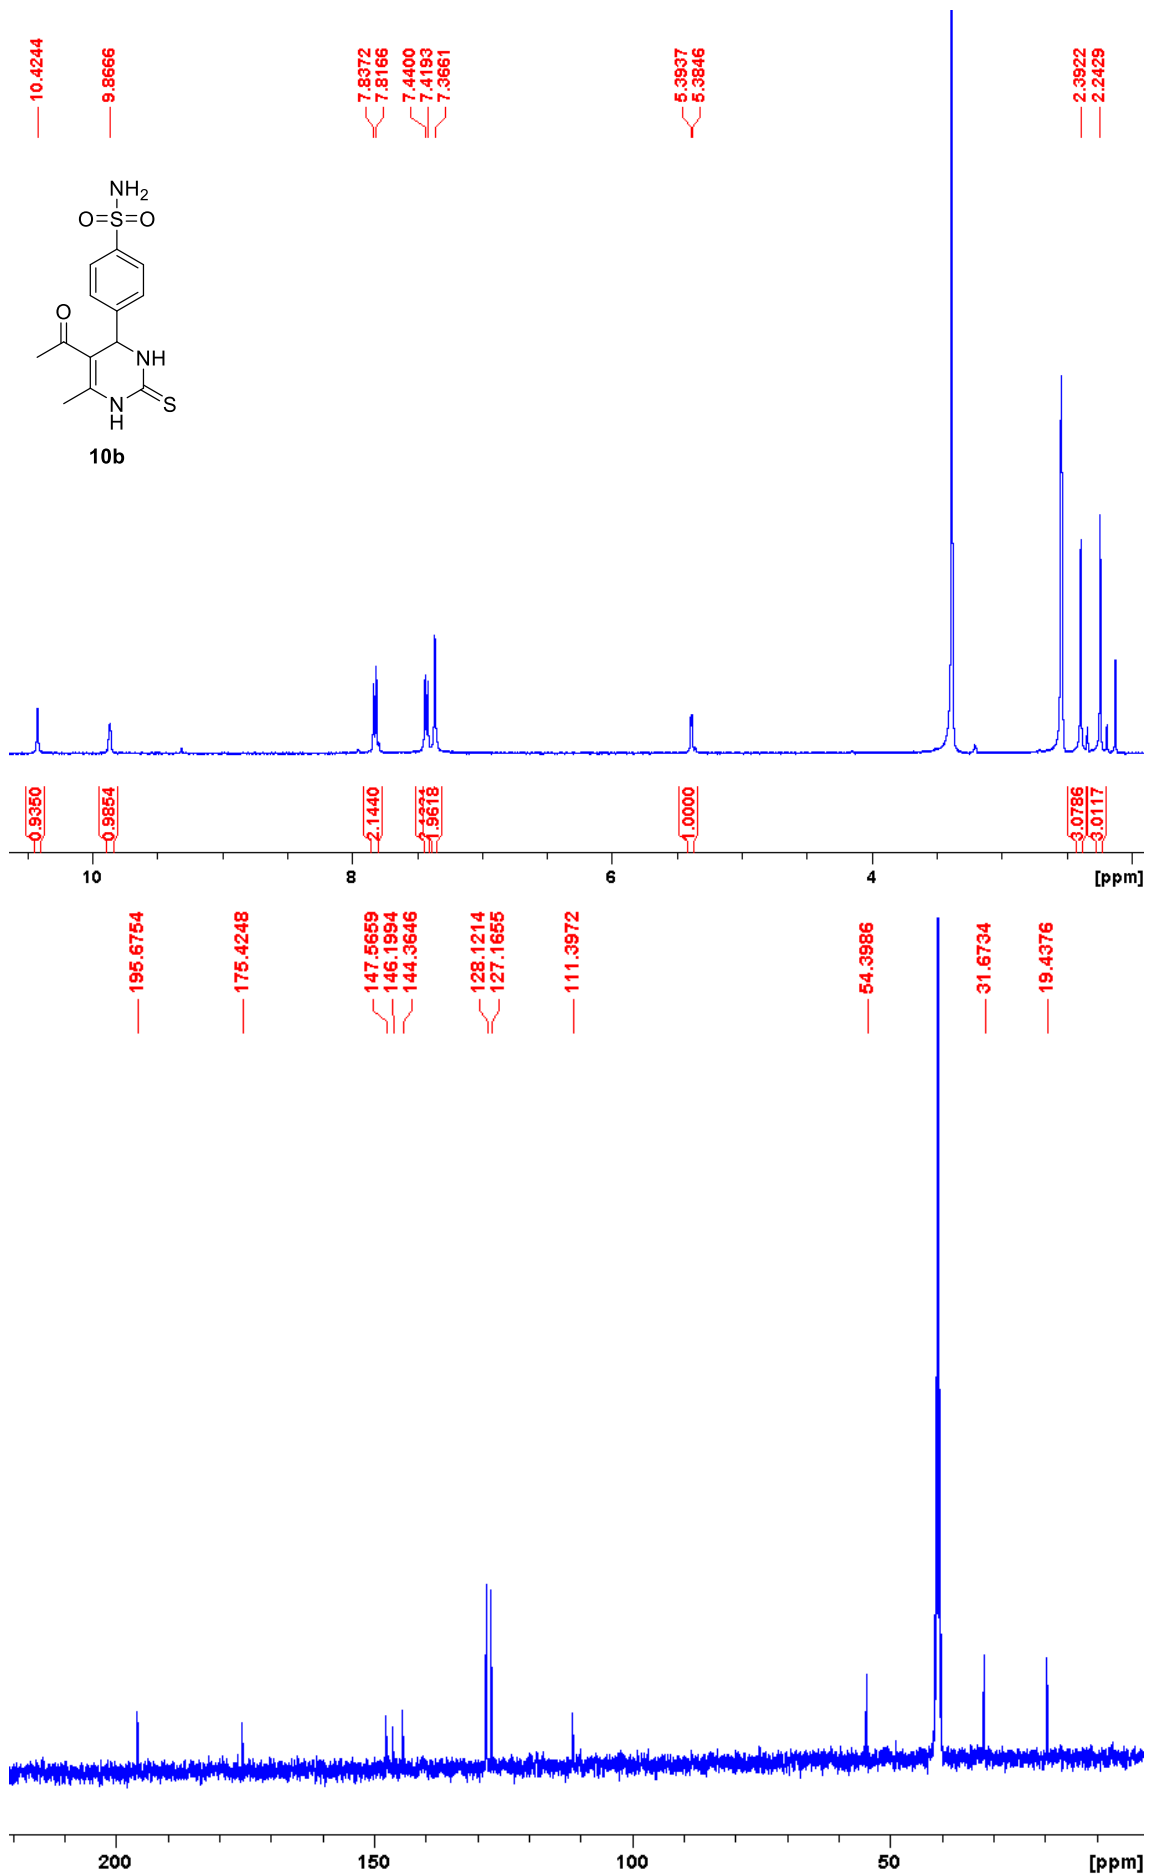

9.5587

8.1274  
8.1193  
7.8752  
7.8545  
7.8748  
7.8540  
7.3577  
7.2953  
7.2774  
7.2493  
7.2319  
7.1851  
7.1674  
7.1579  
7.1501  
7.1400  
7.1152  
7.0965  
7.0792  
7.0595  
7.0402  
7.0214

5.4377  
5.4294

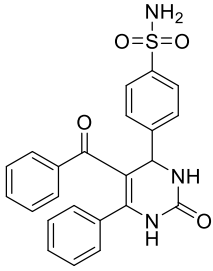

11a

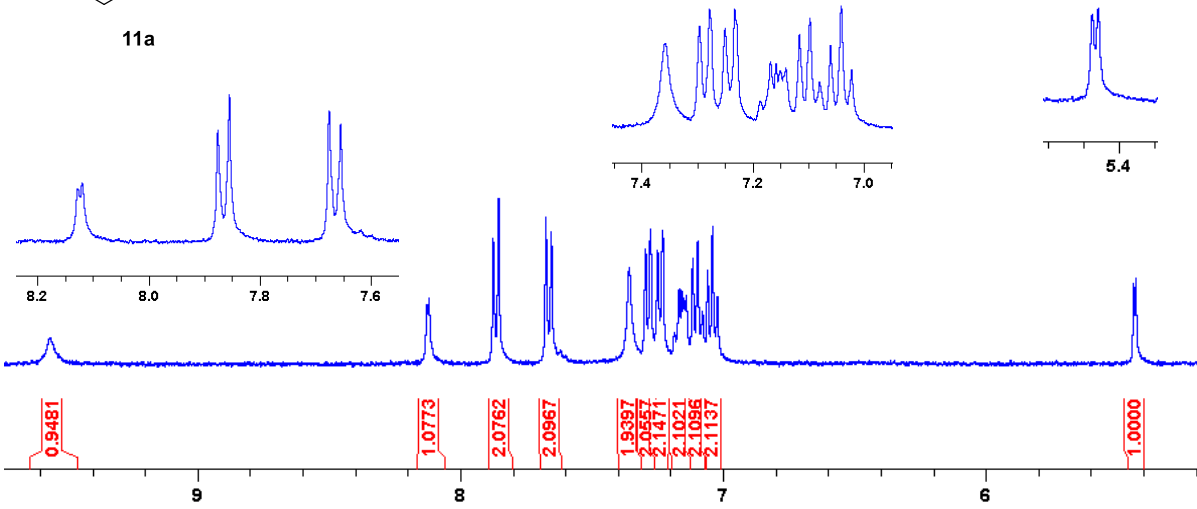

195.7393

153.4814  
150.2345  
148.8927  
144.0959  
140.5235  
134.3146  
131.7320  
130.9227  
130.8098  
129.5715  
128.8187  
128.4842  
128.1593  
127.0284

109.6993

56.2097

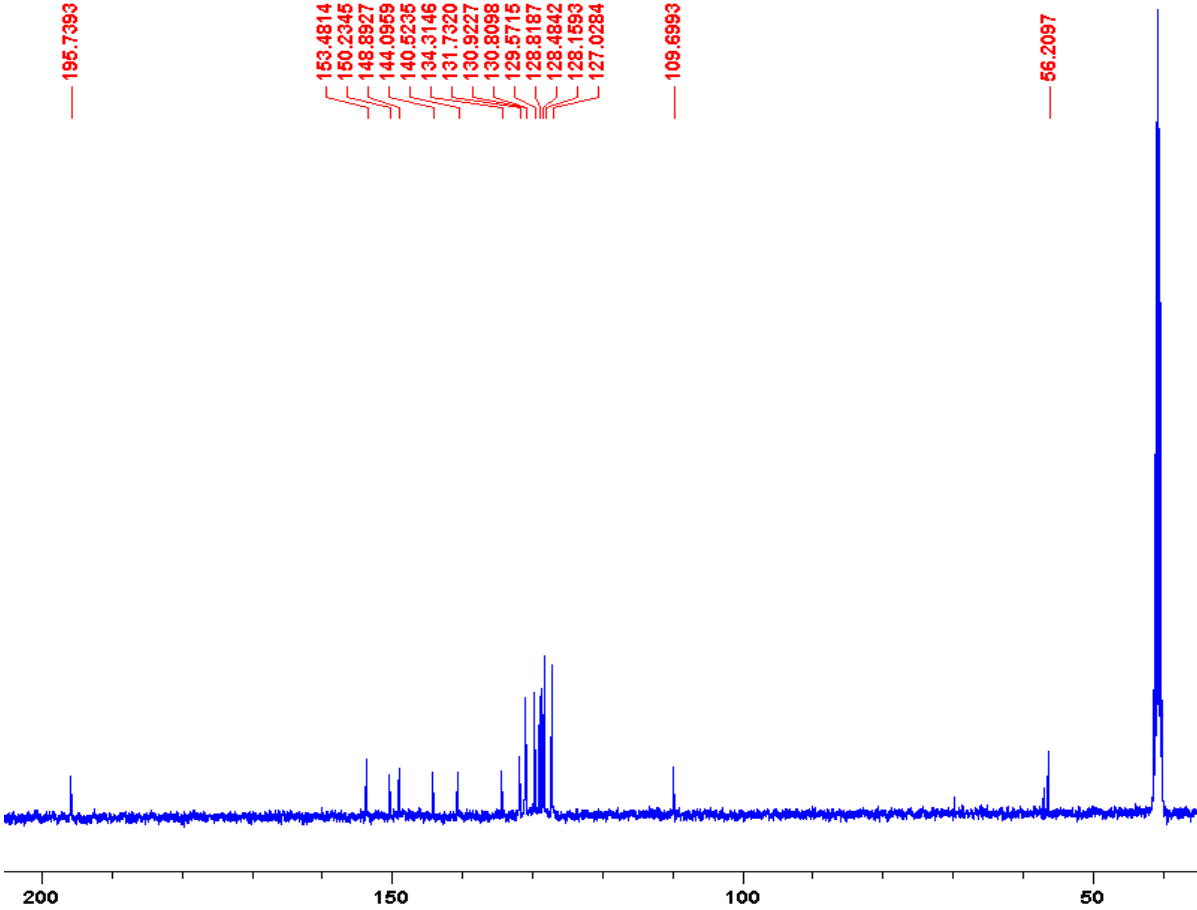

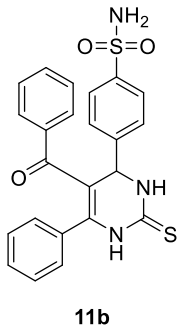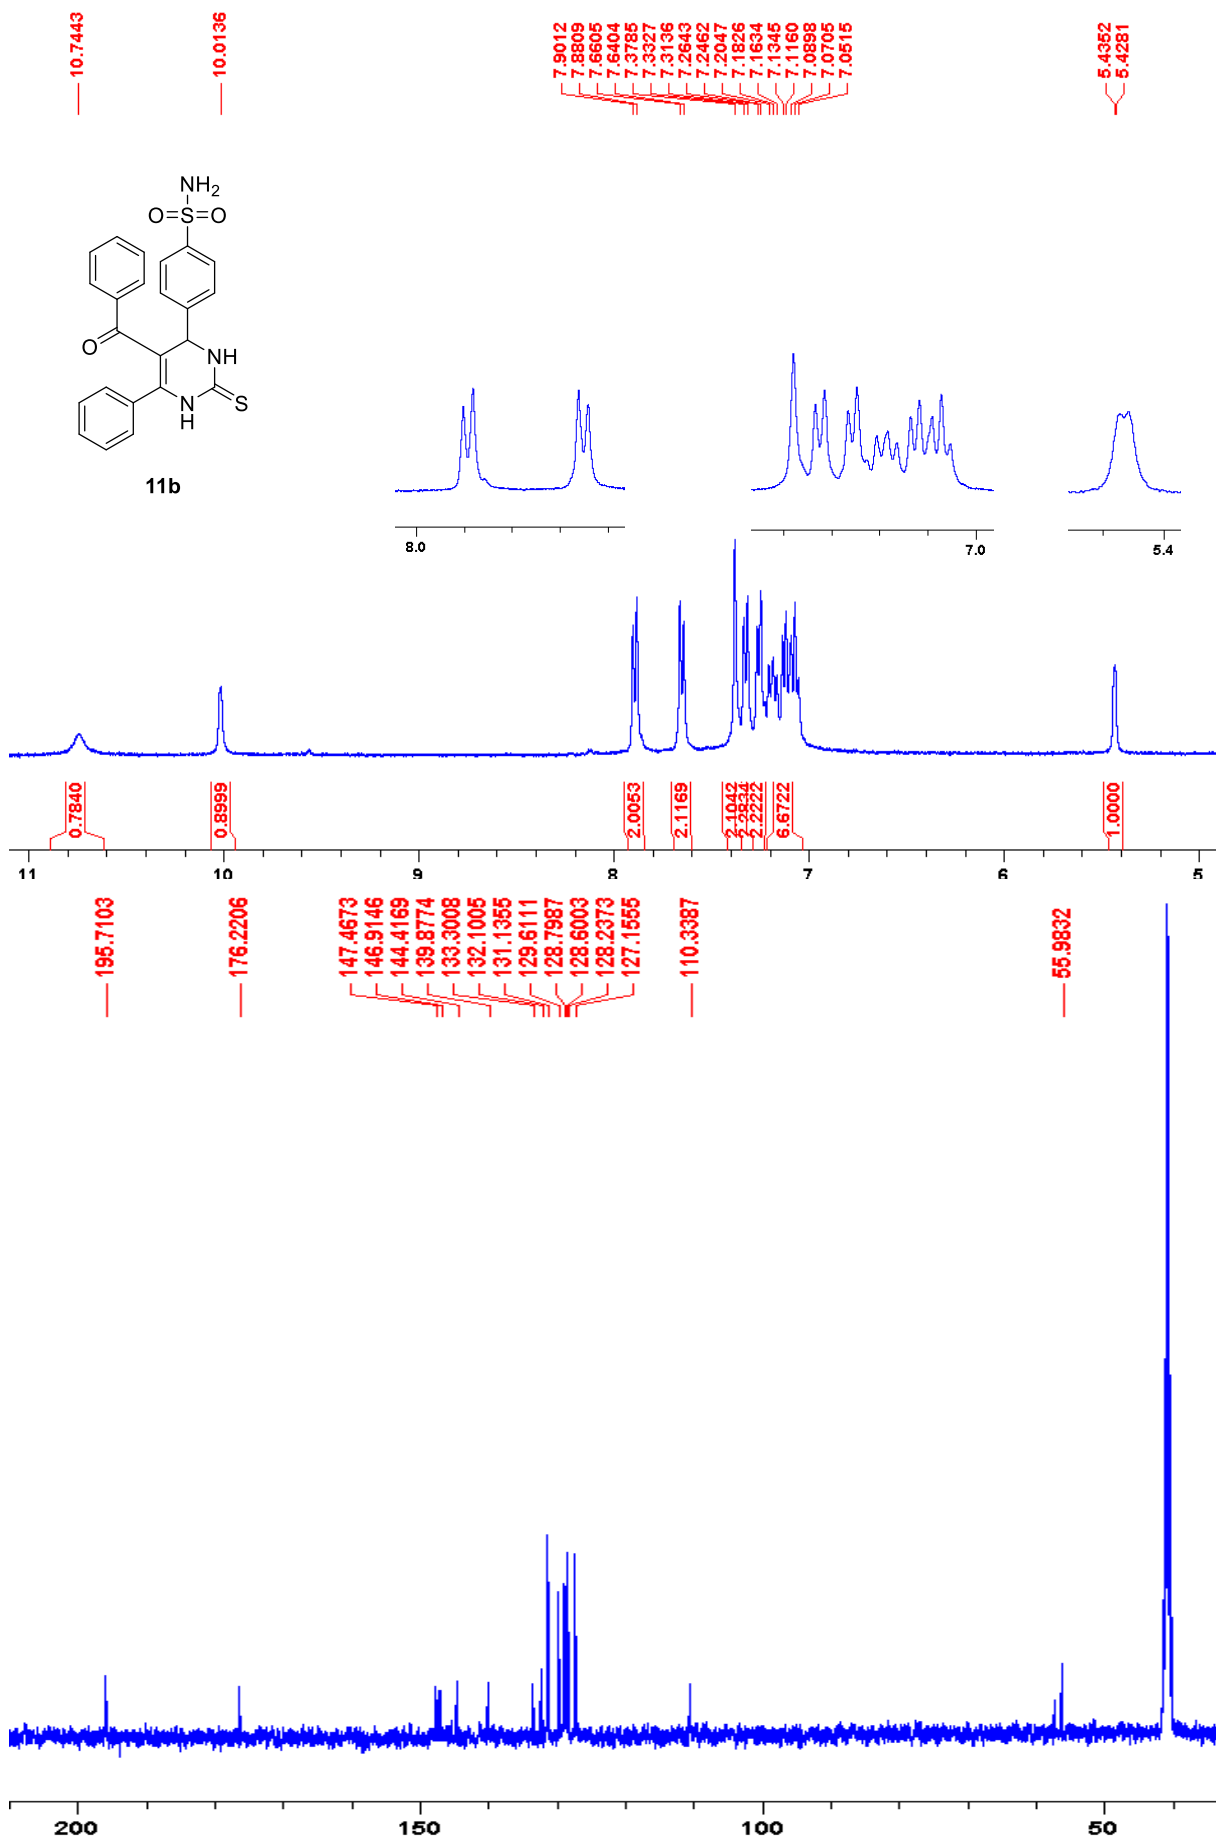

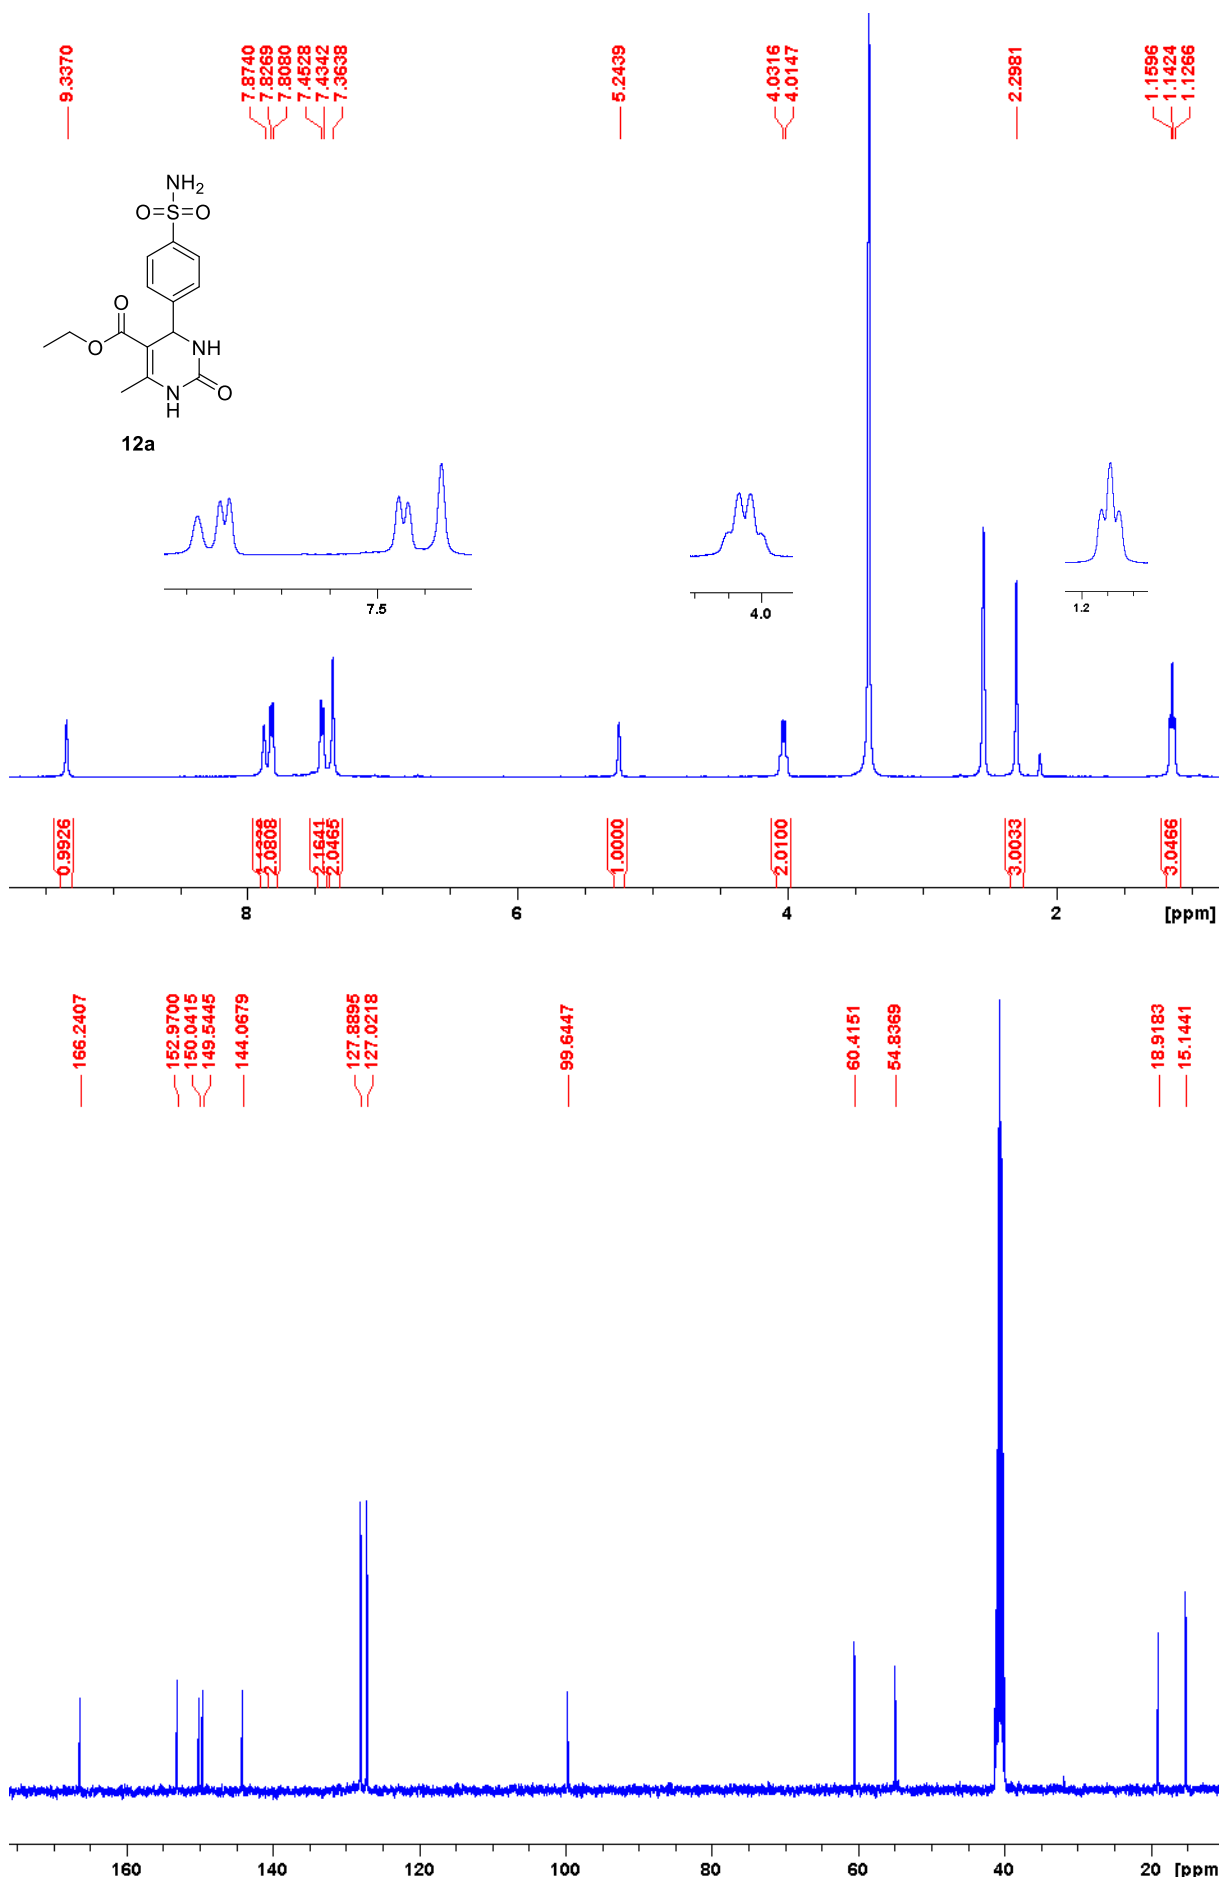

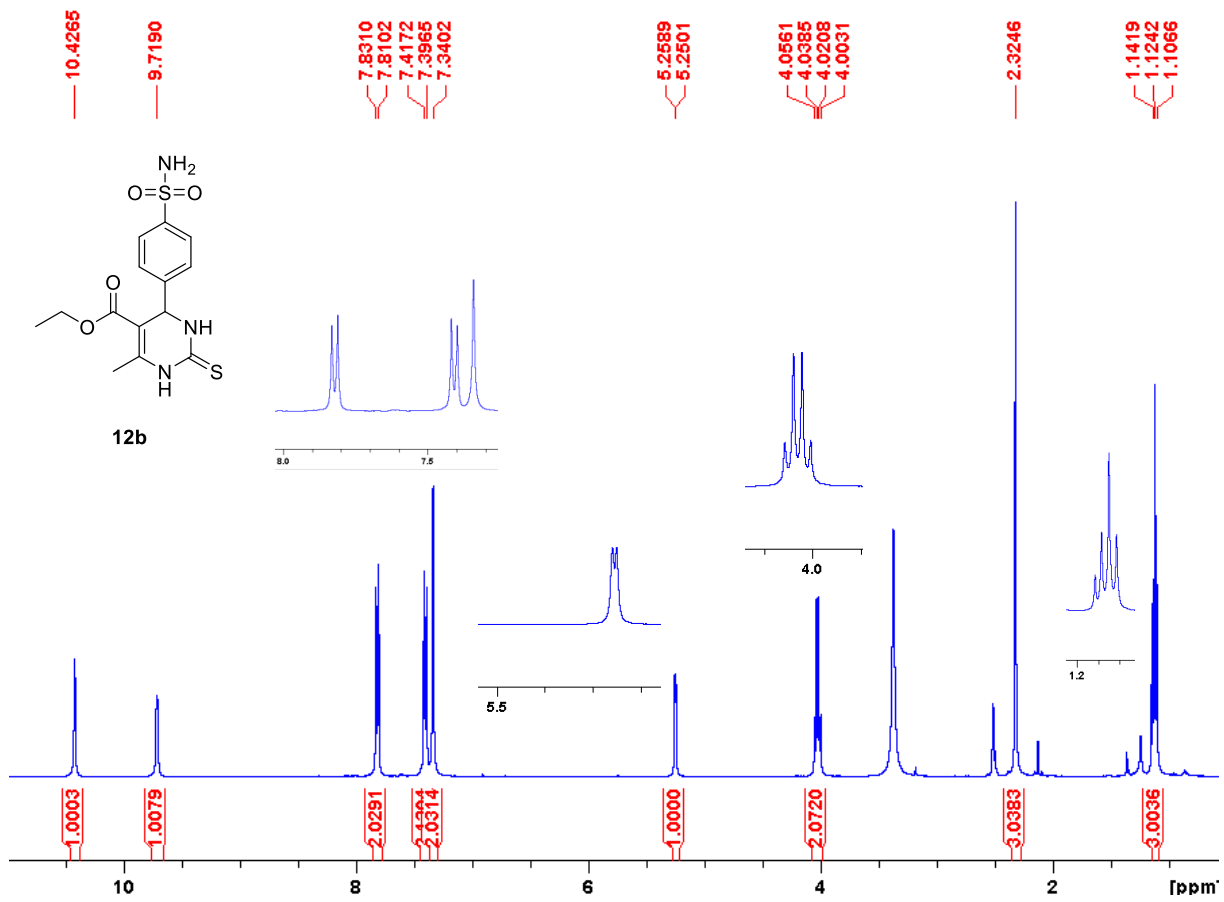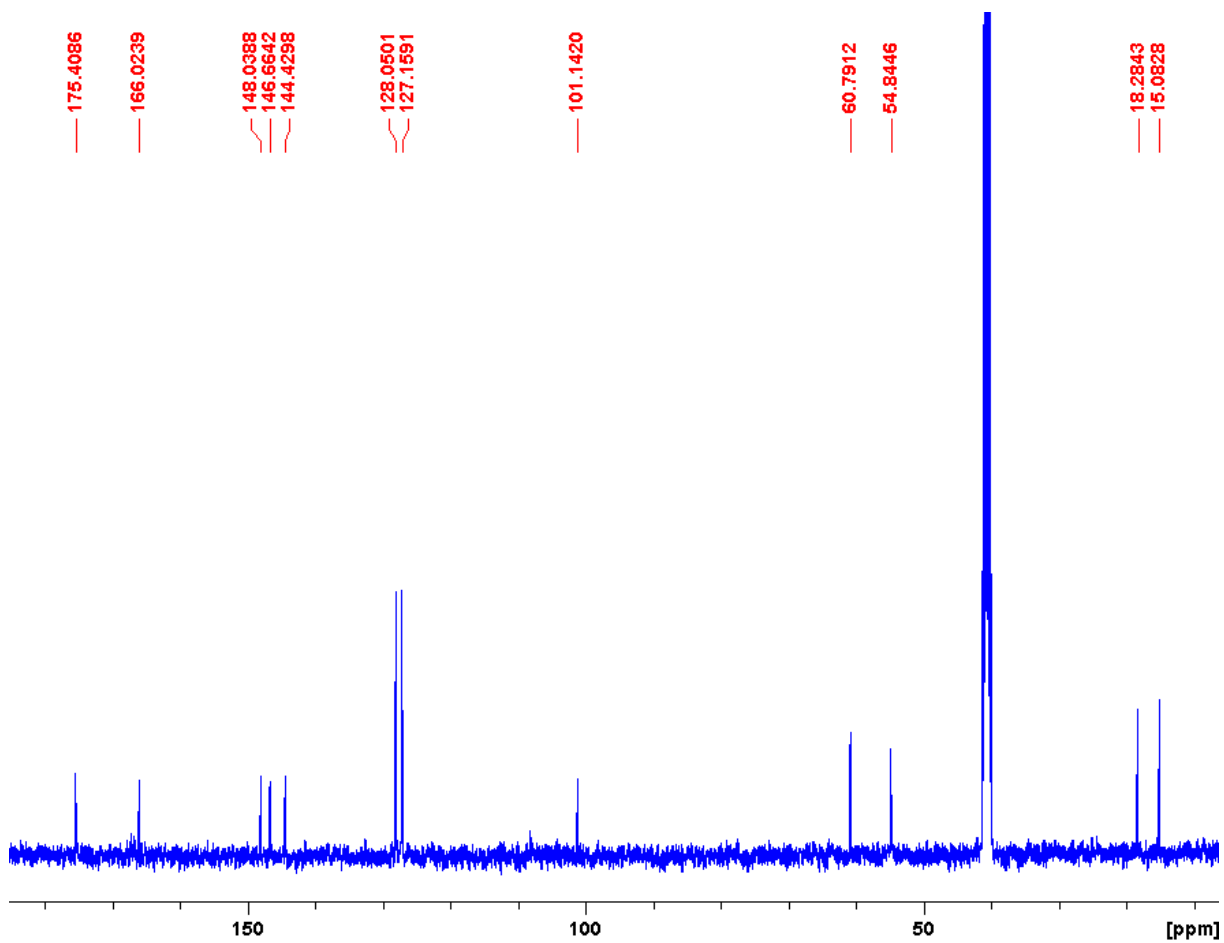

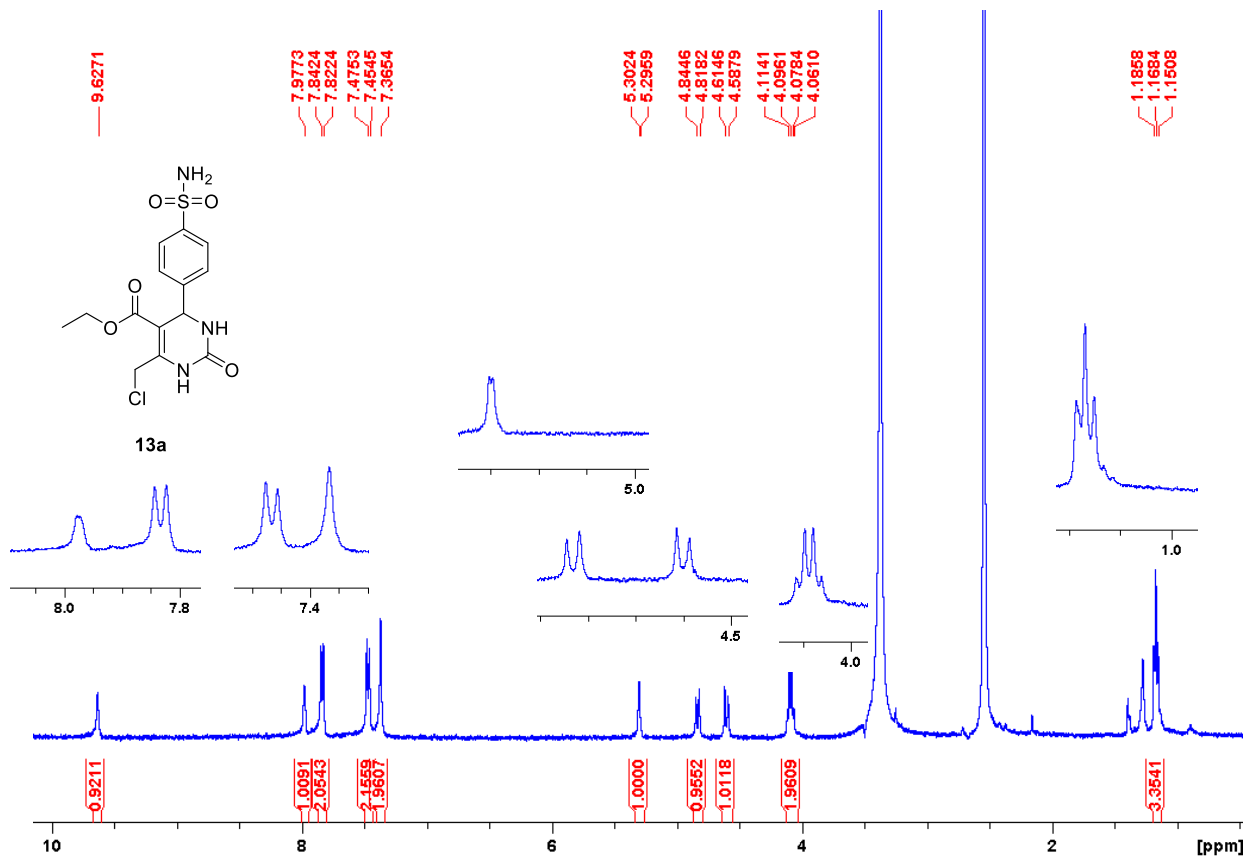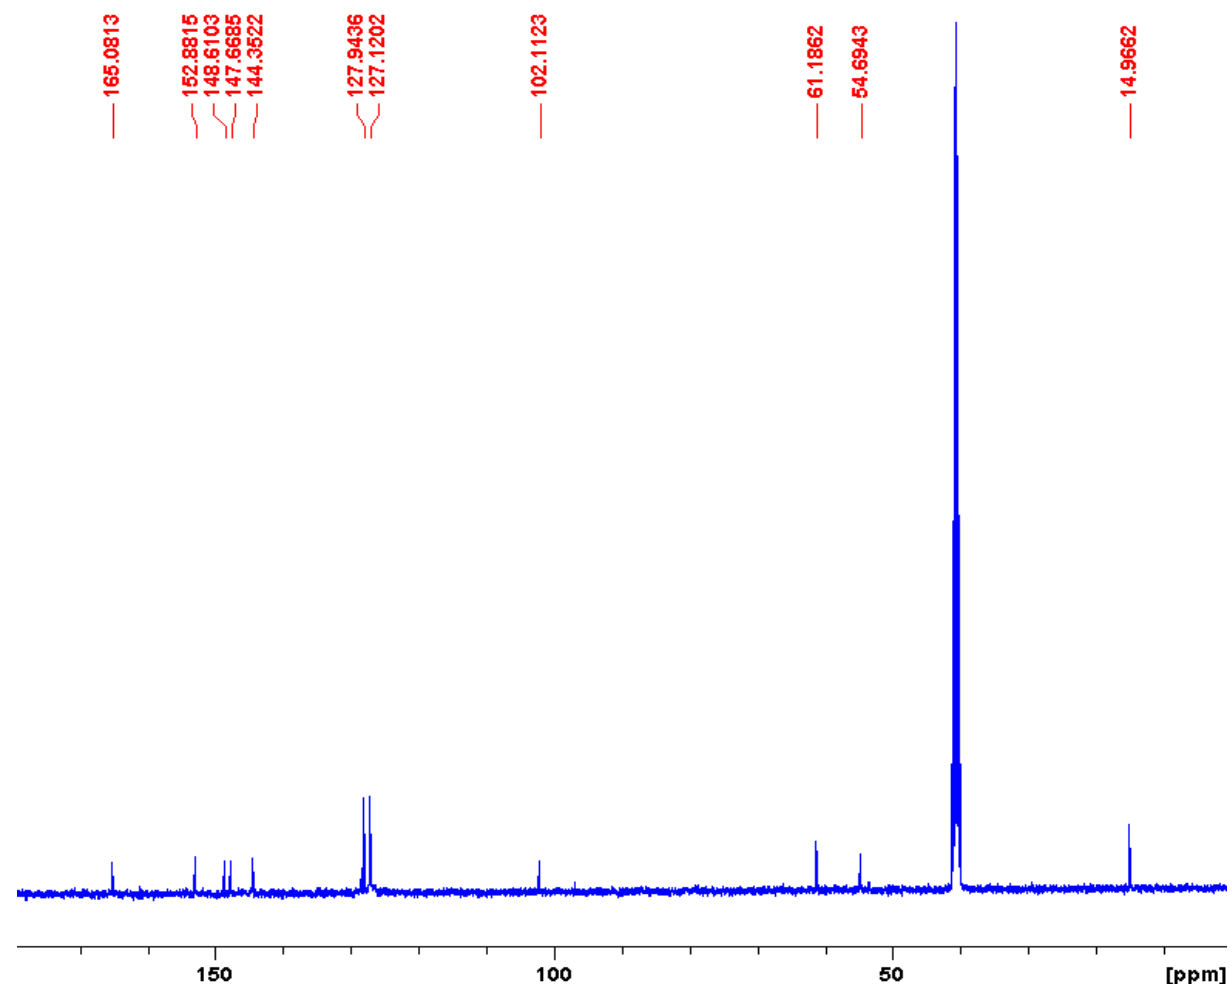

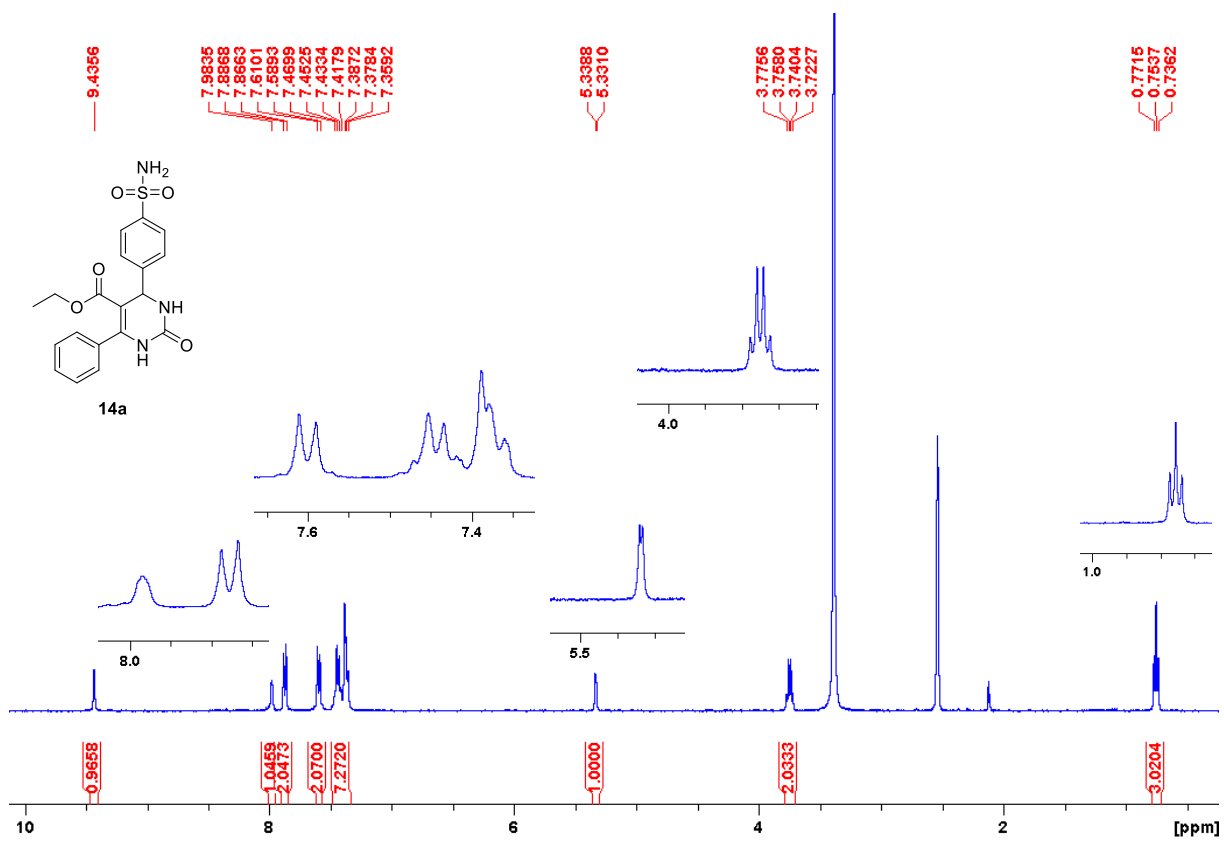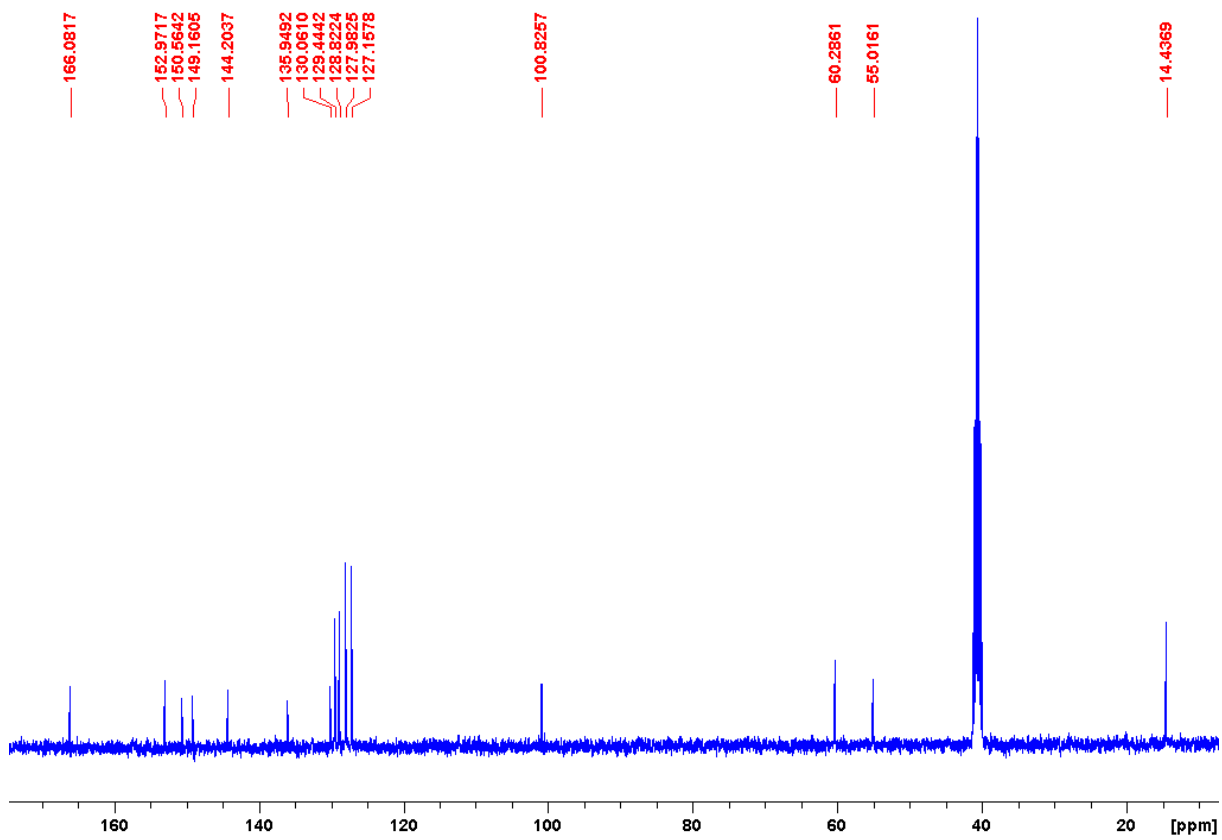

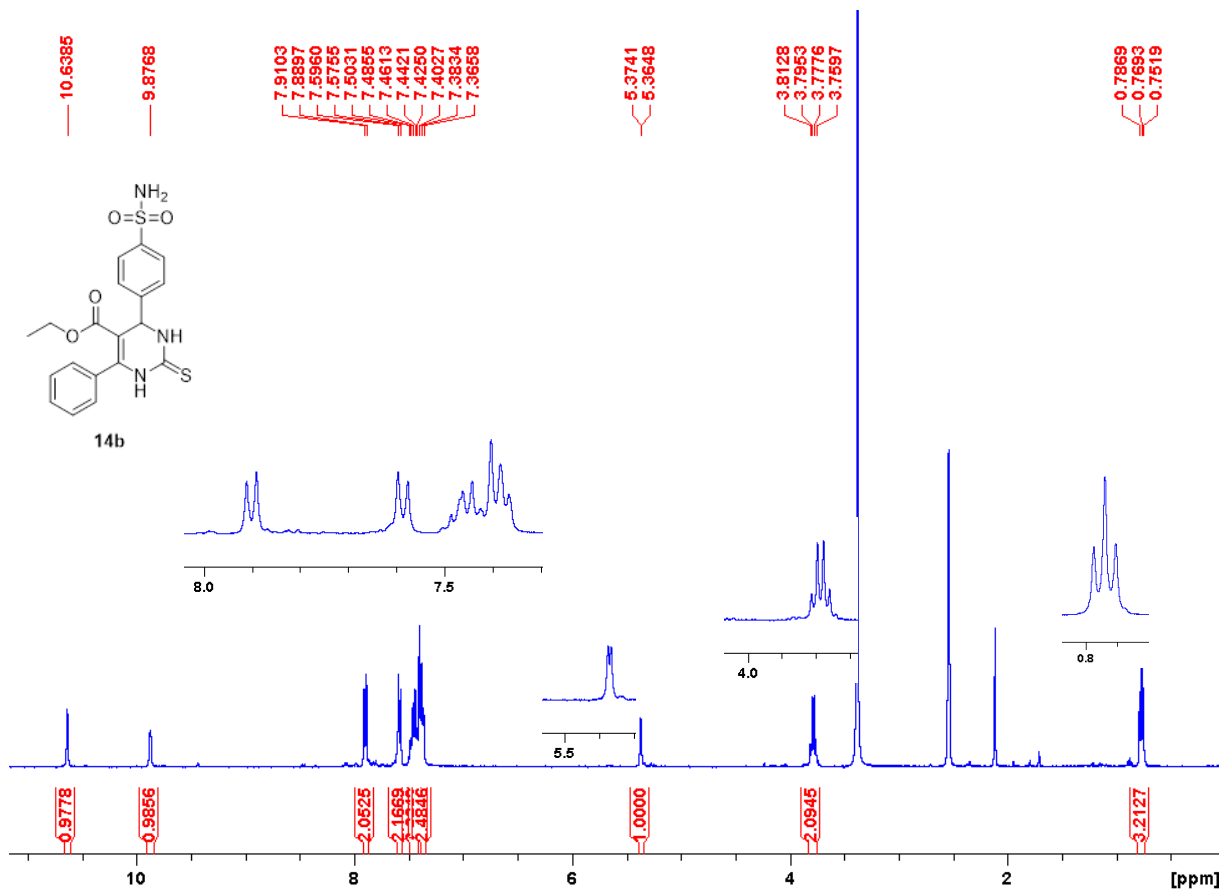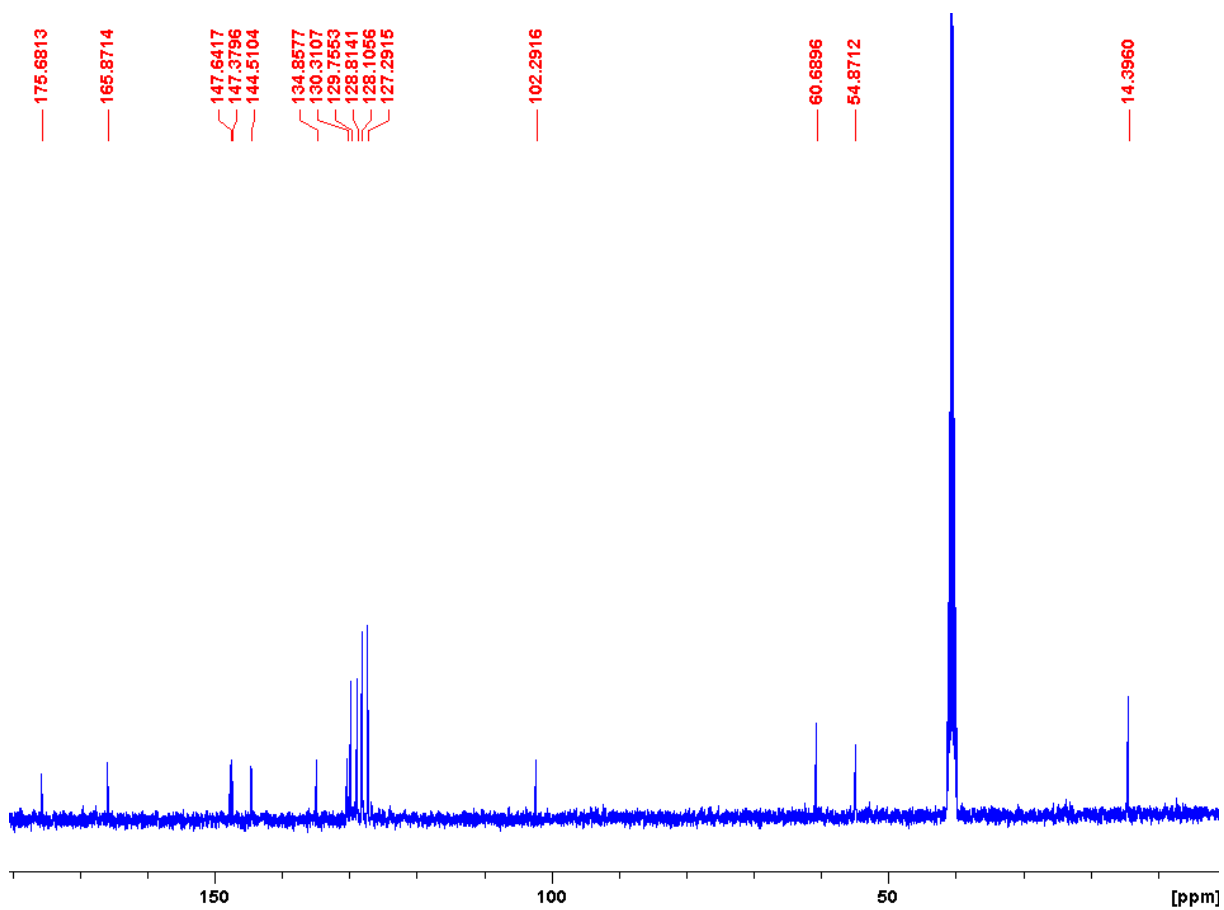



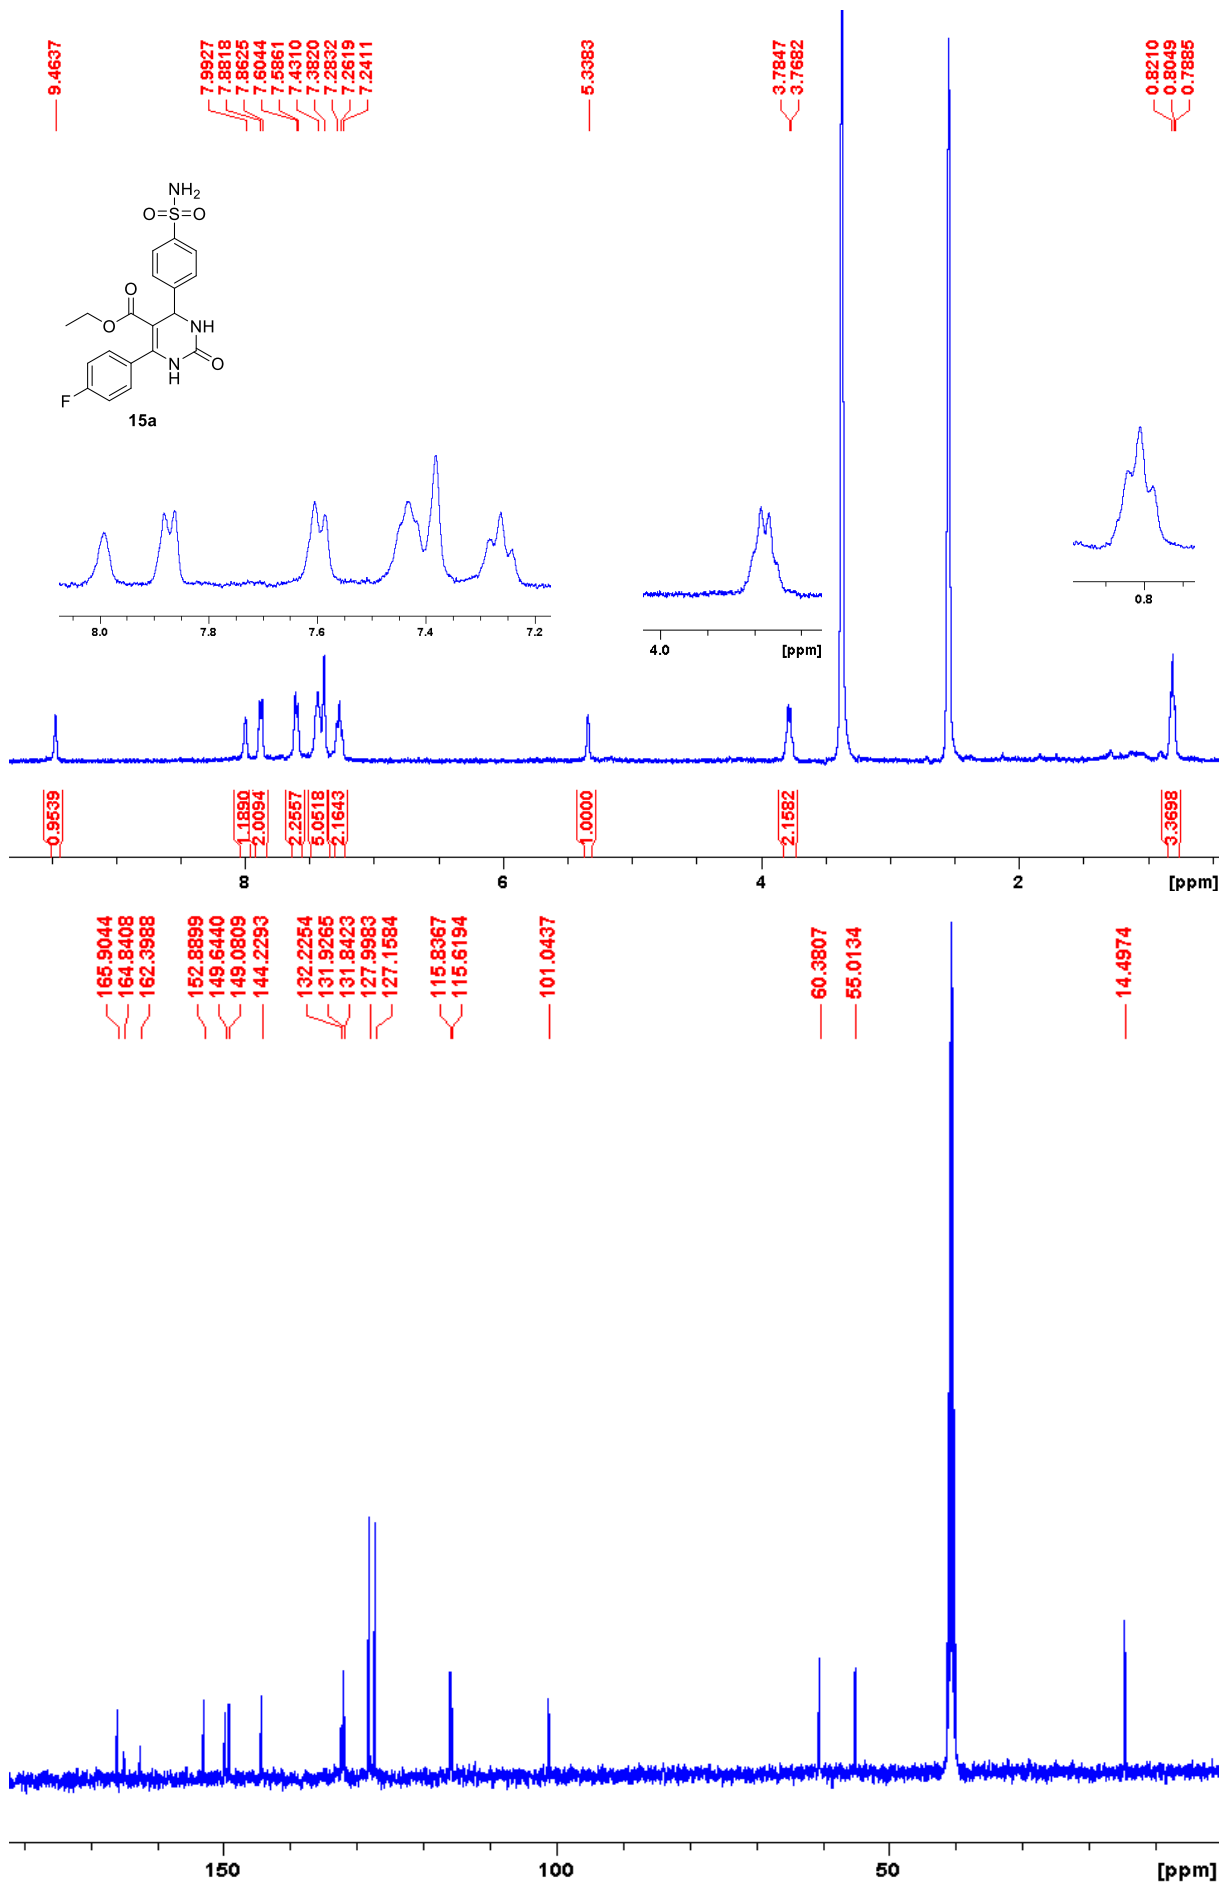

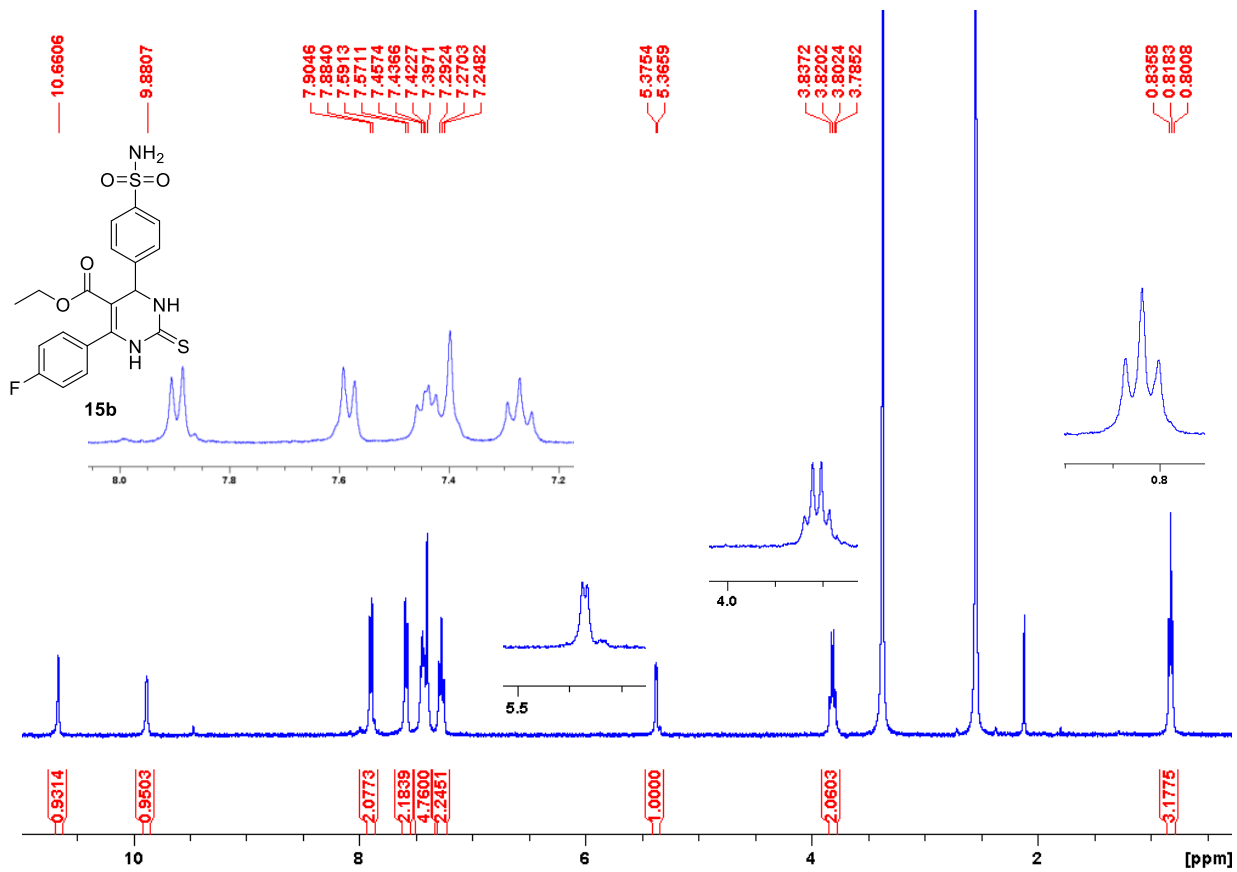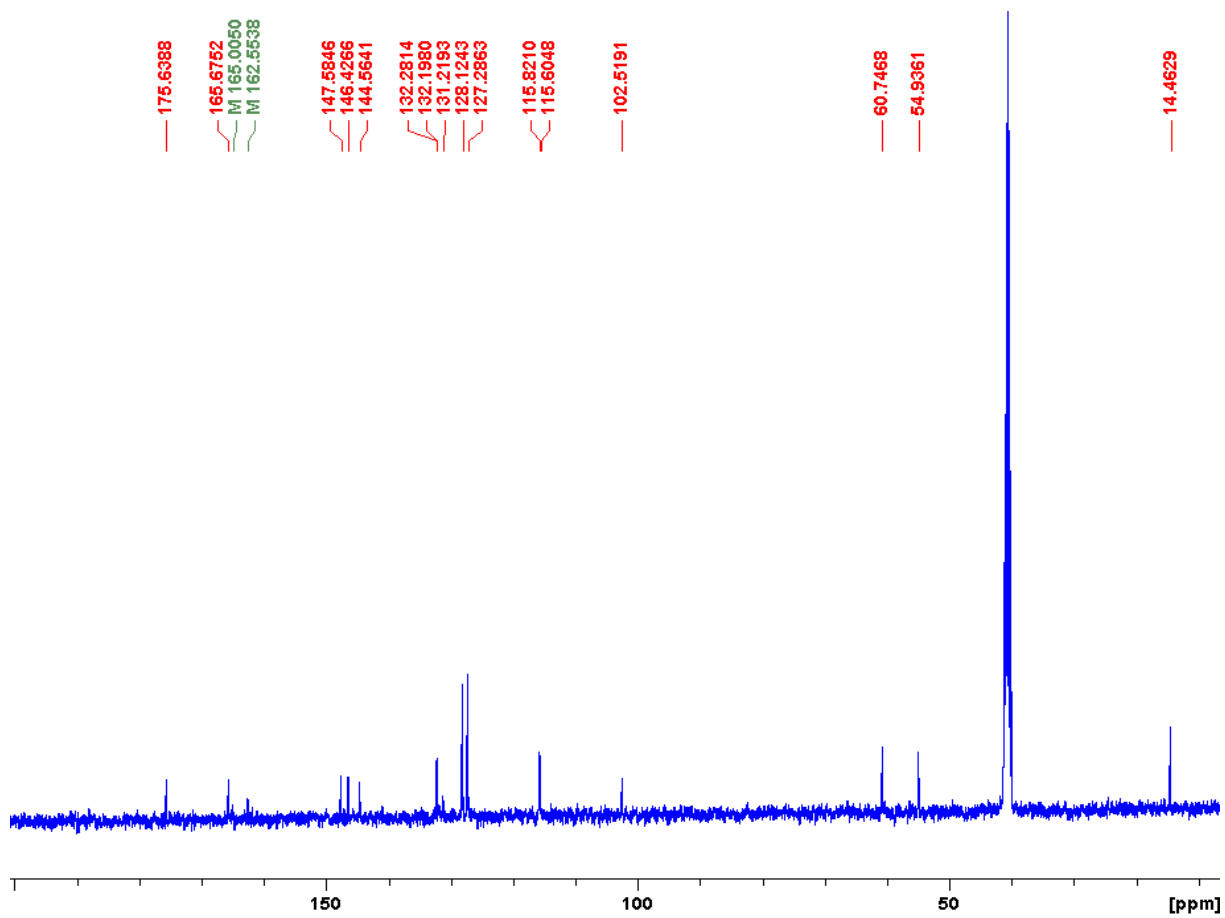

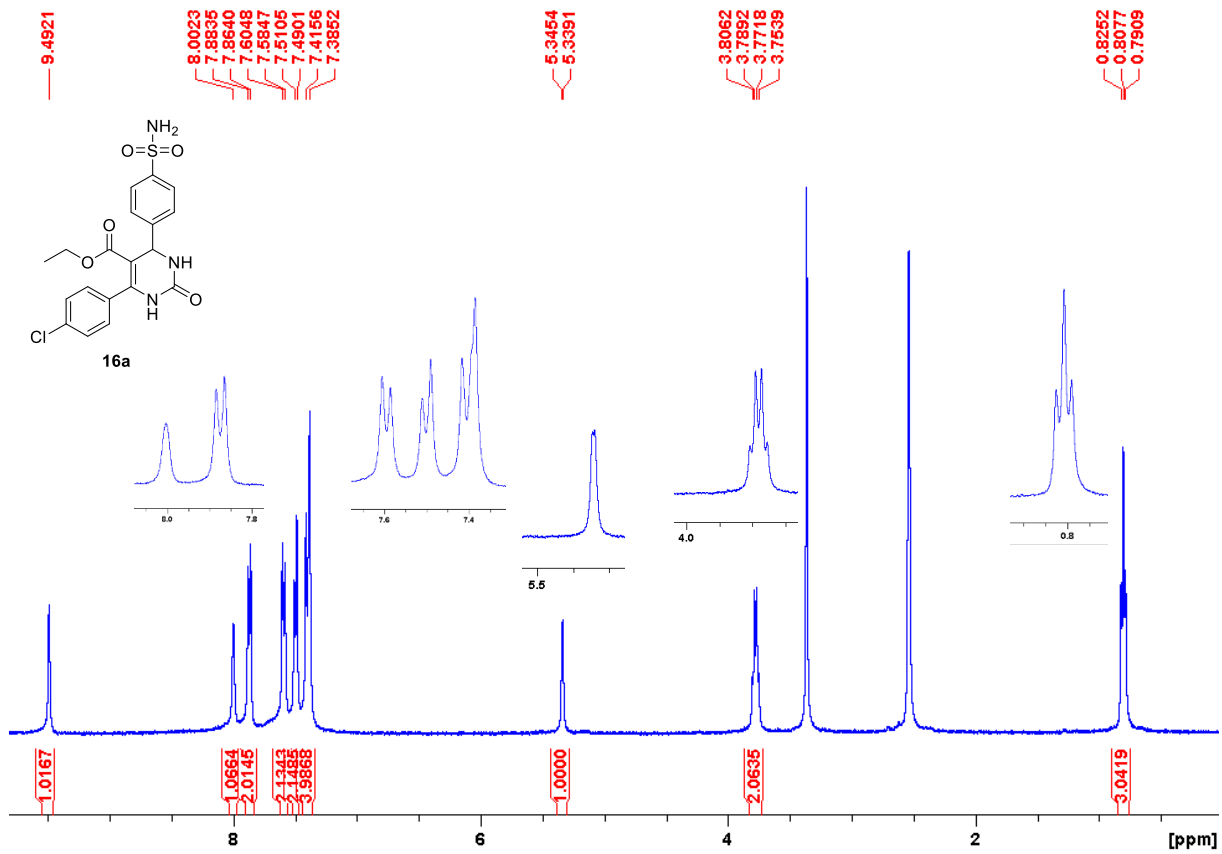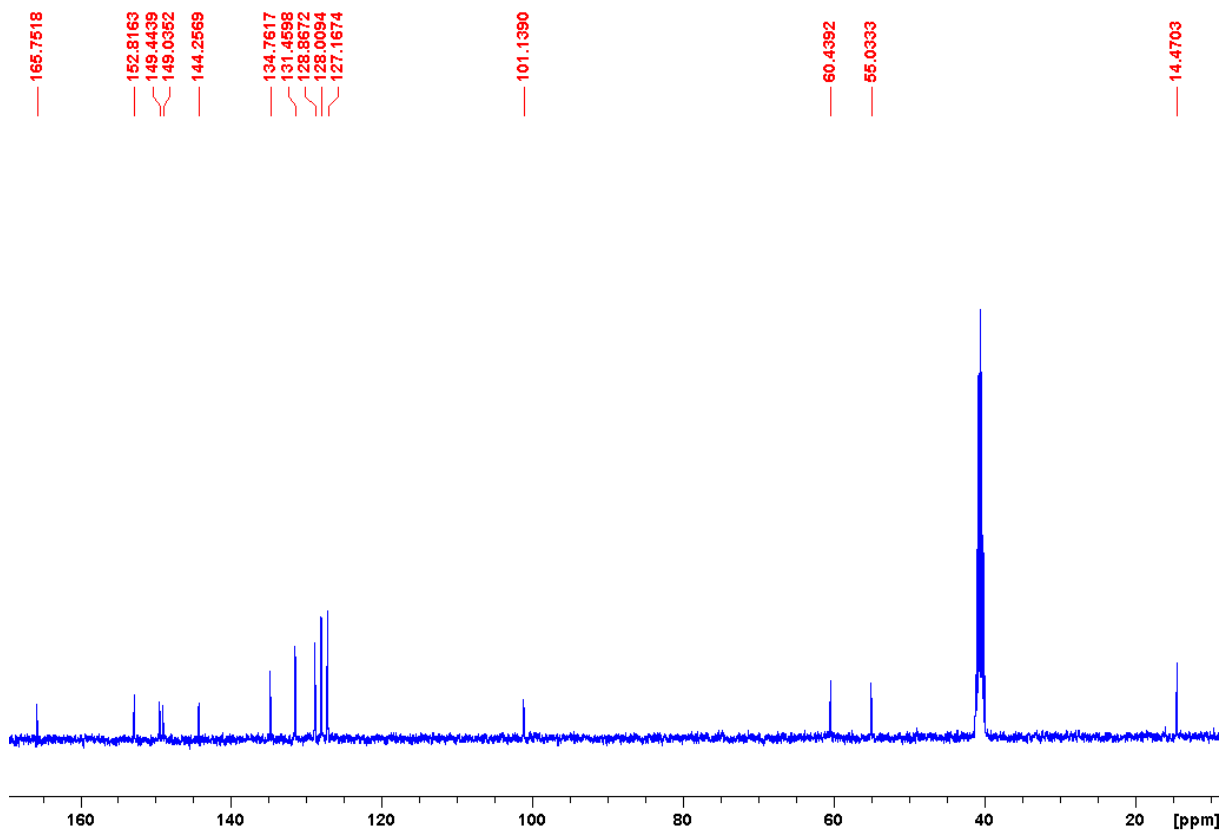

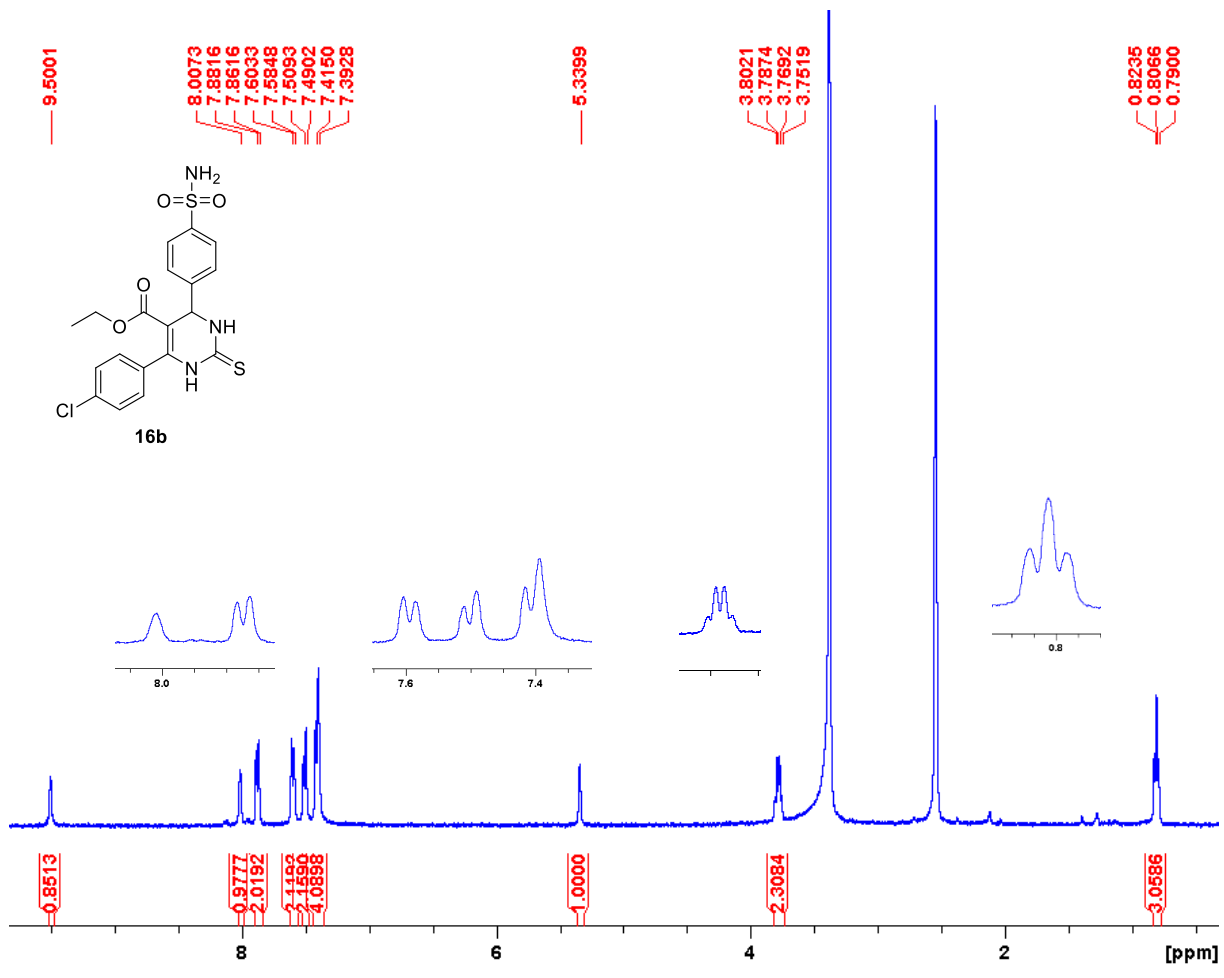

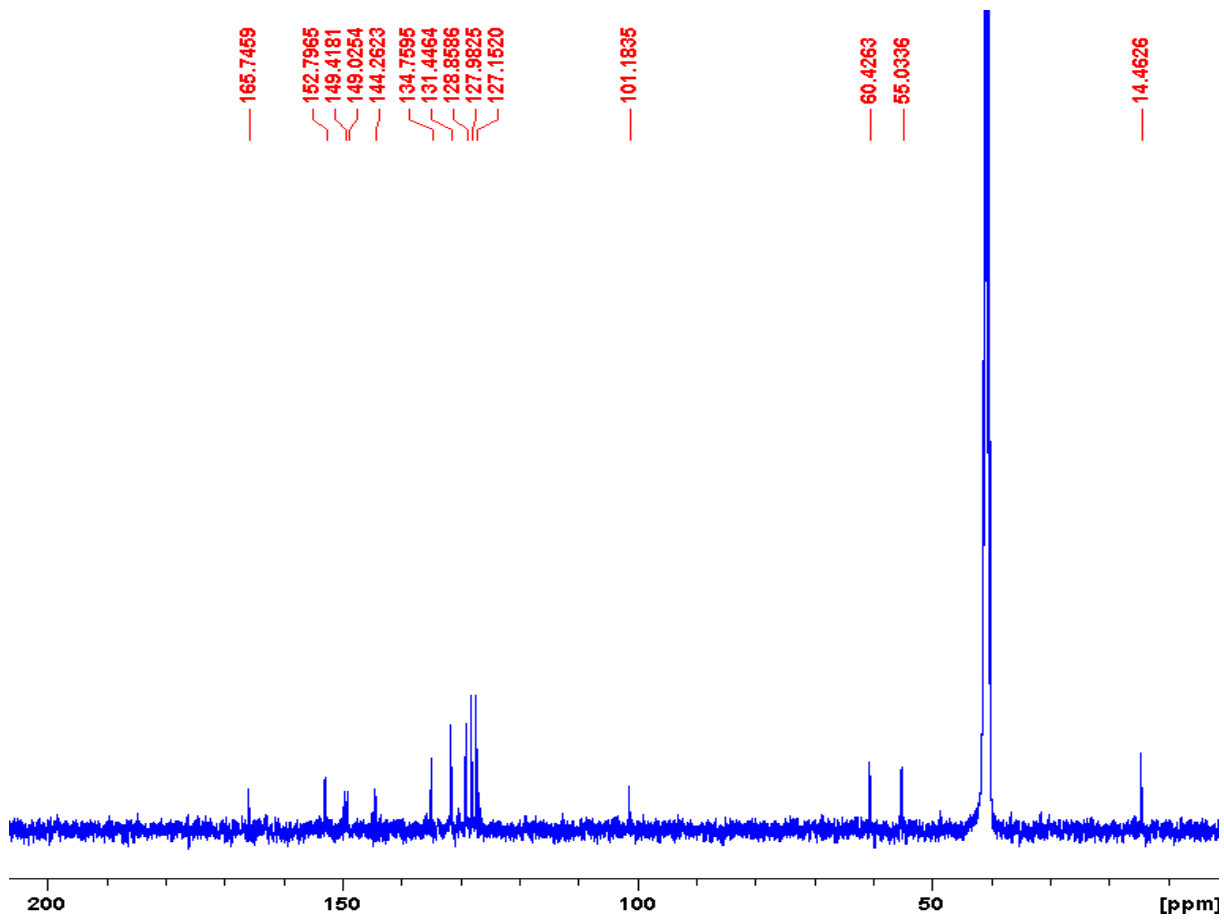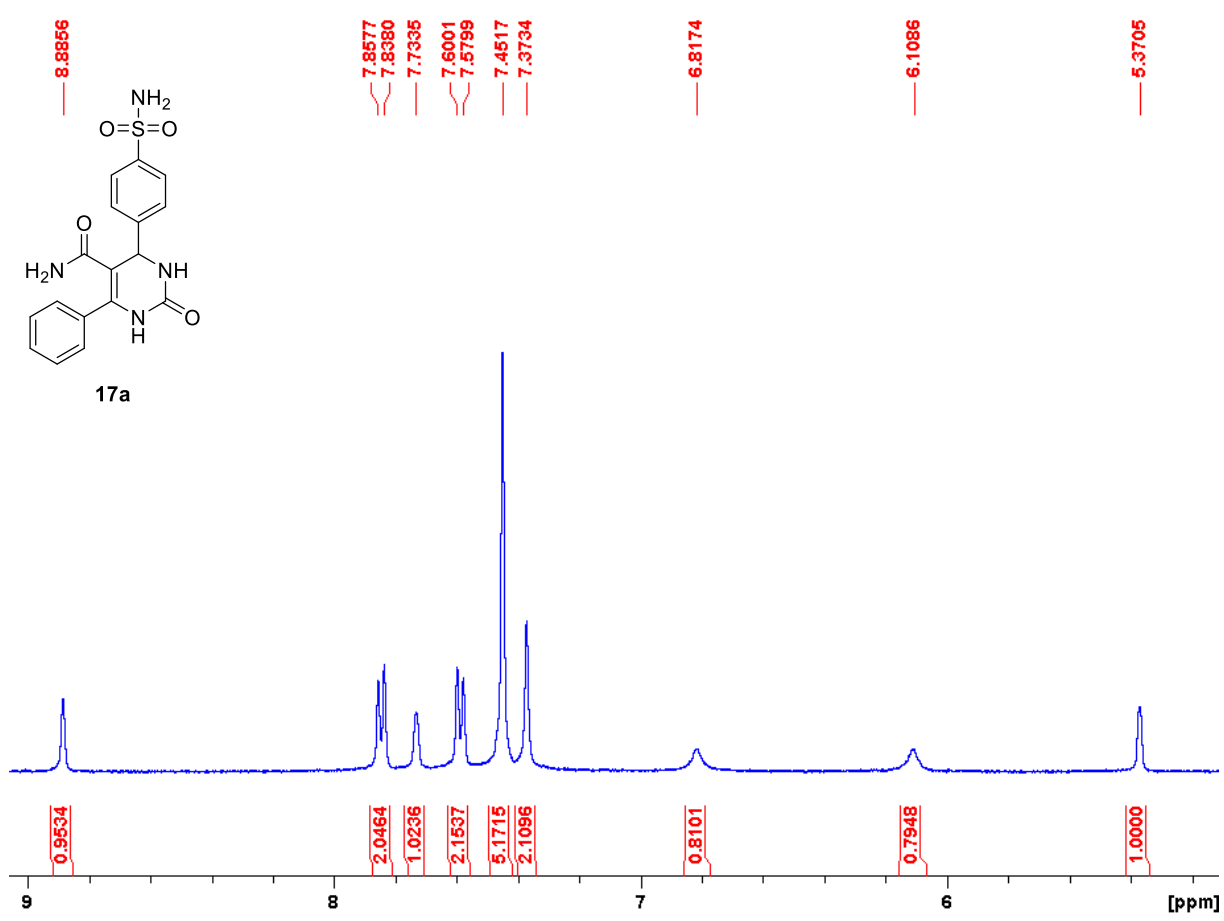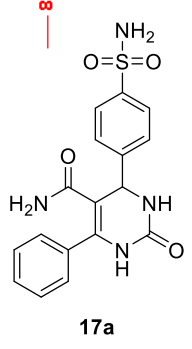

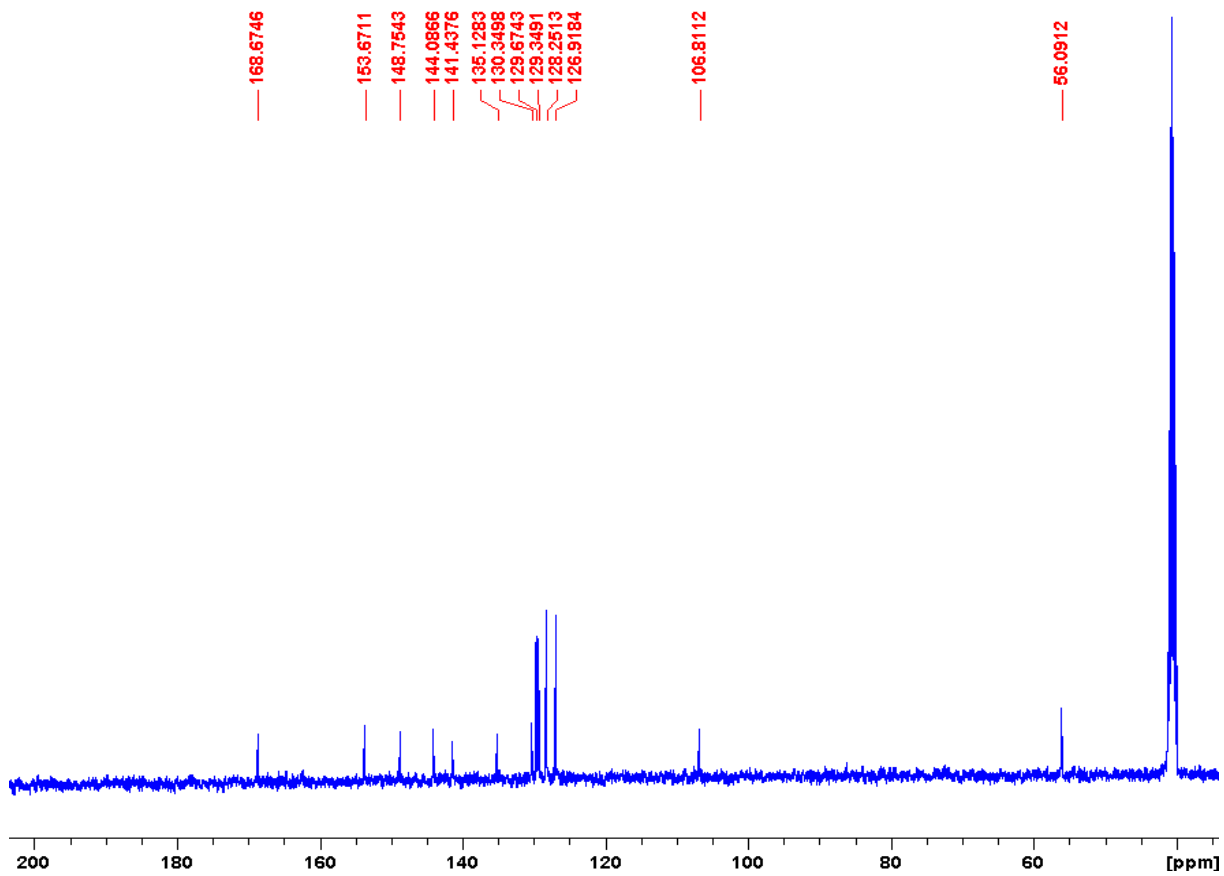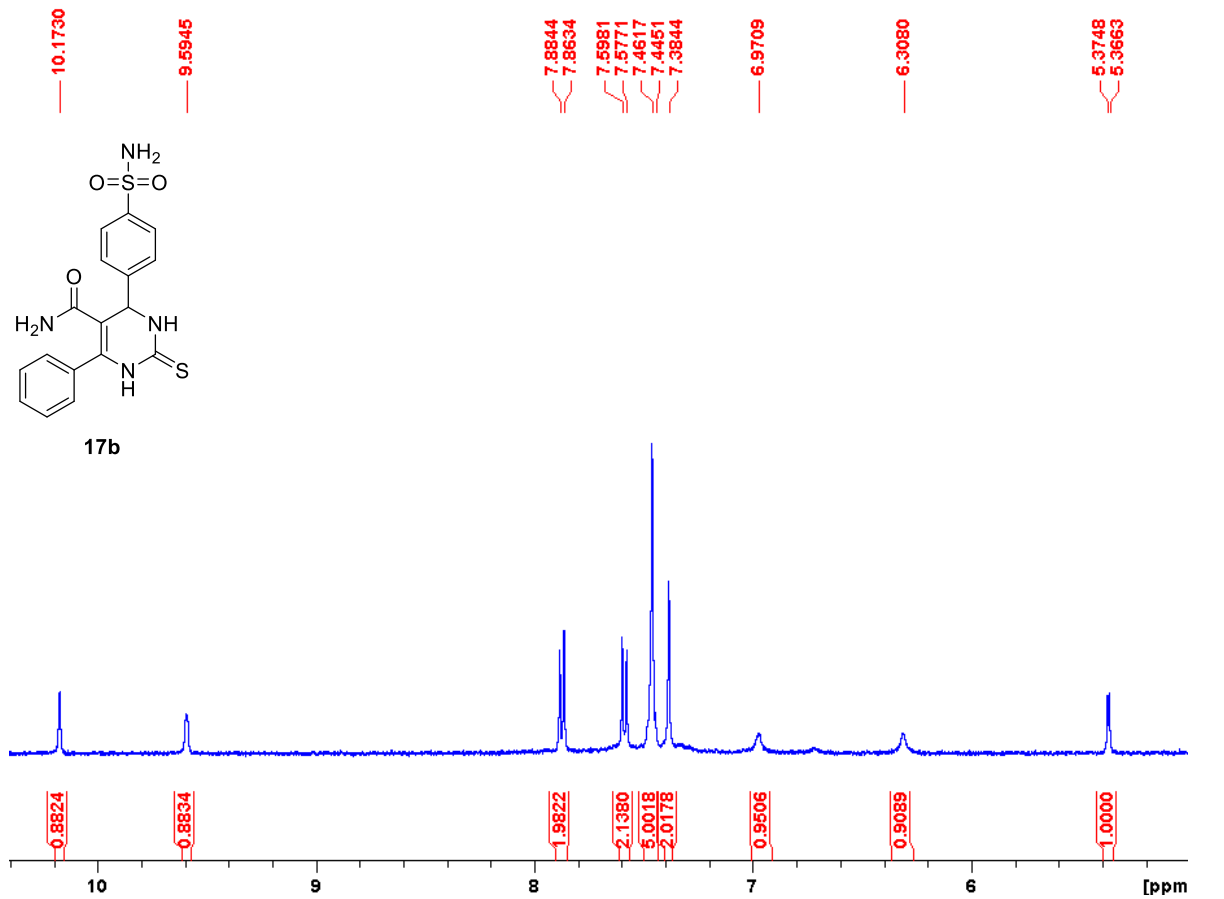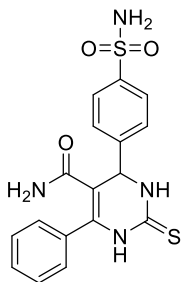

17b

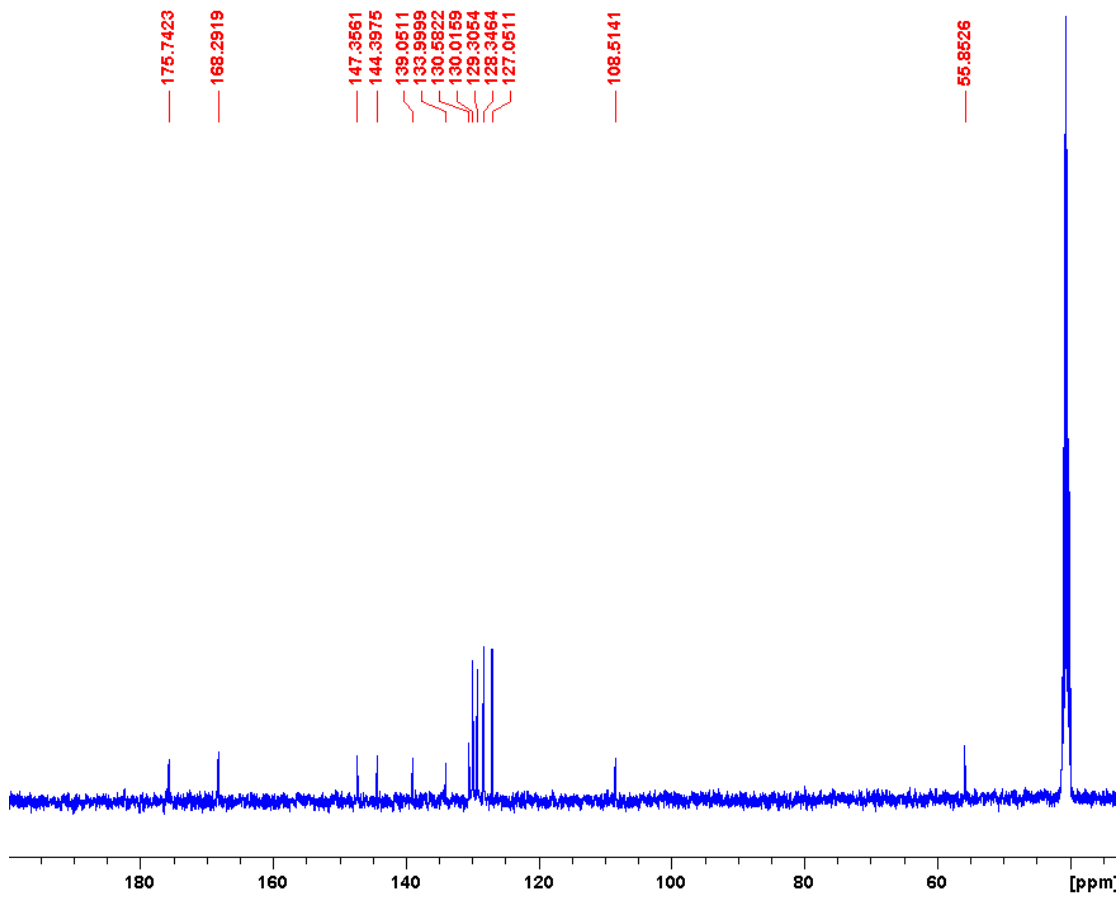

11.5069  
11.3410

8.3353  
8.0817  
8.0620  
7.8996  
7.8743  
7.5521

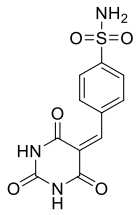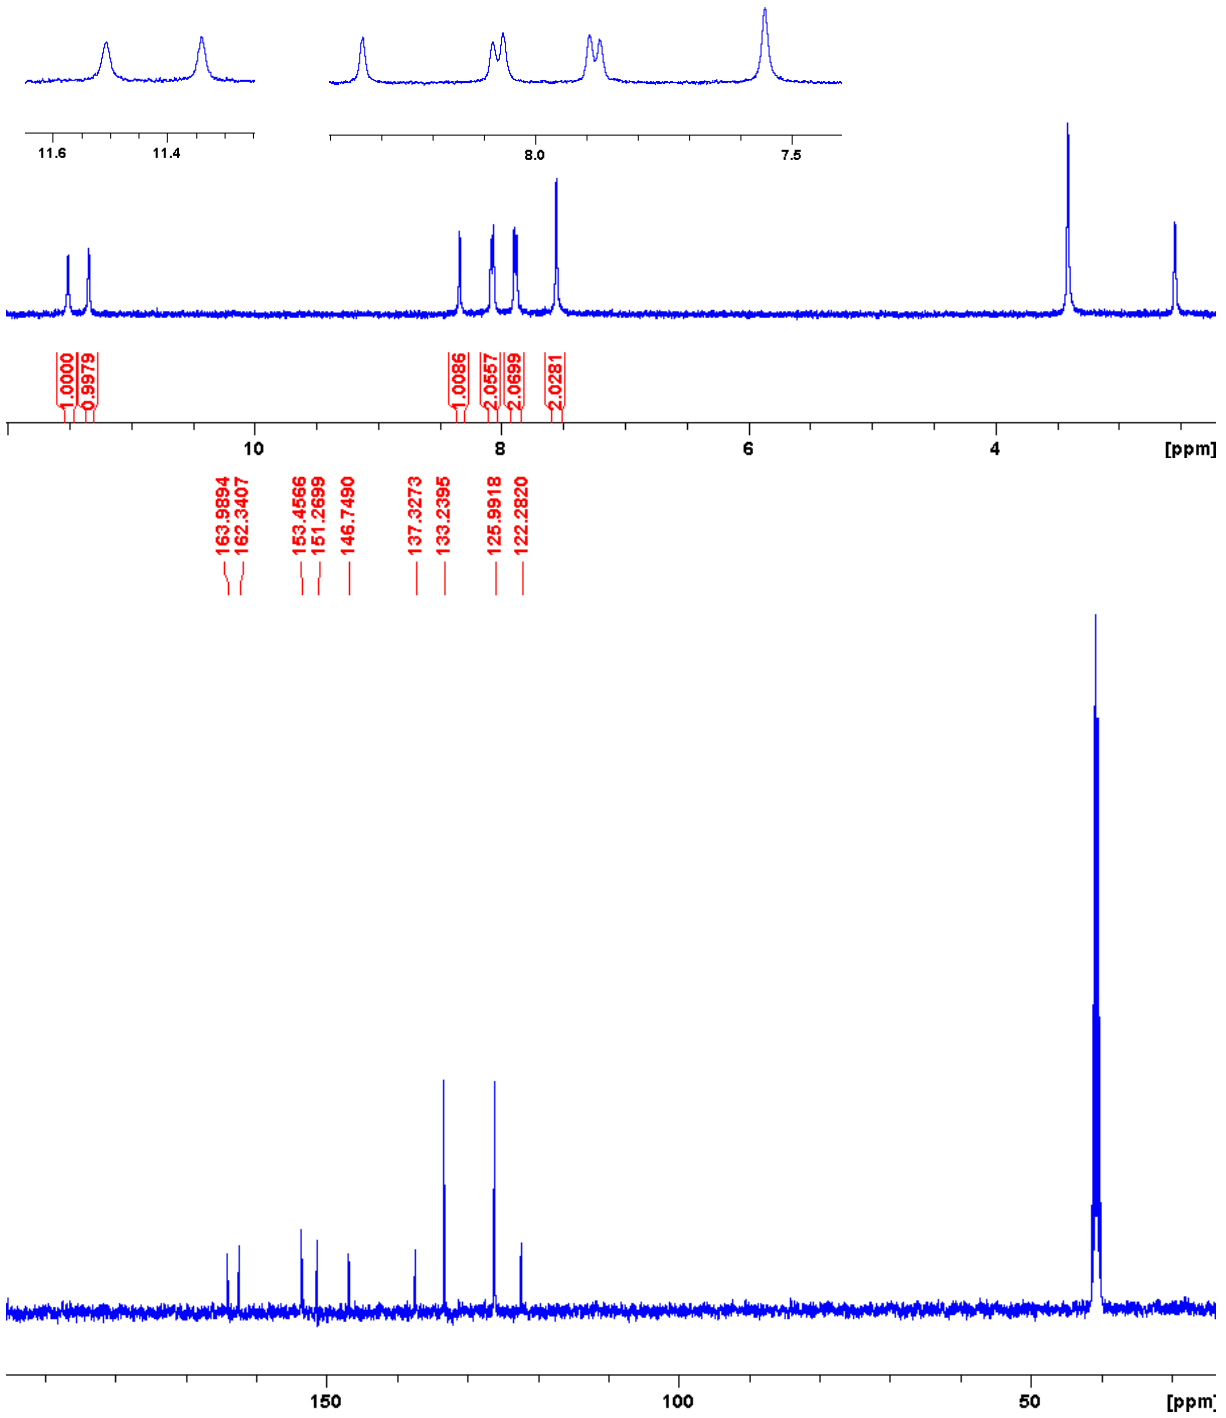



8.4251  
8.0330  
8.0123  
7.9027  
7.8817  
7.5538

3.2822  
3.2006

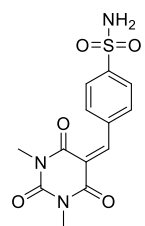

21

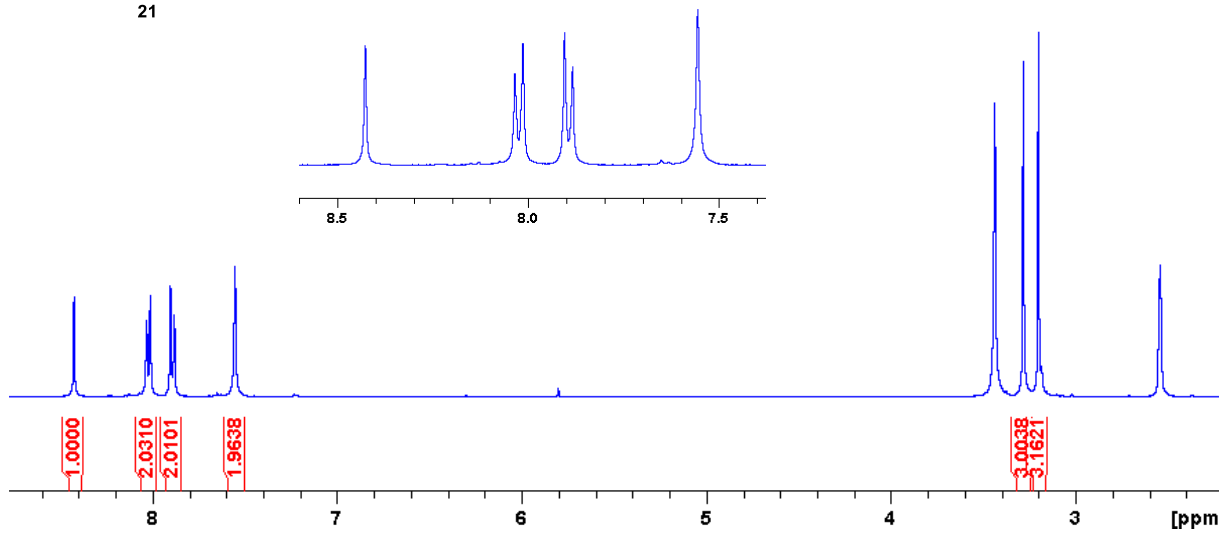

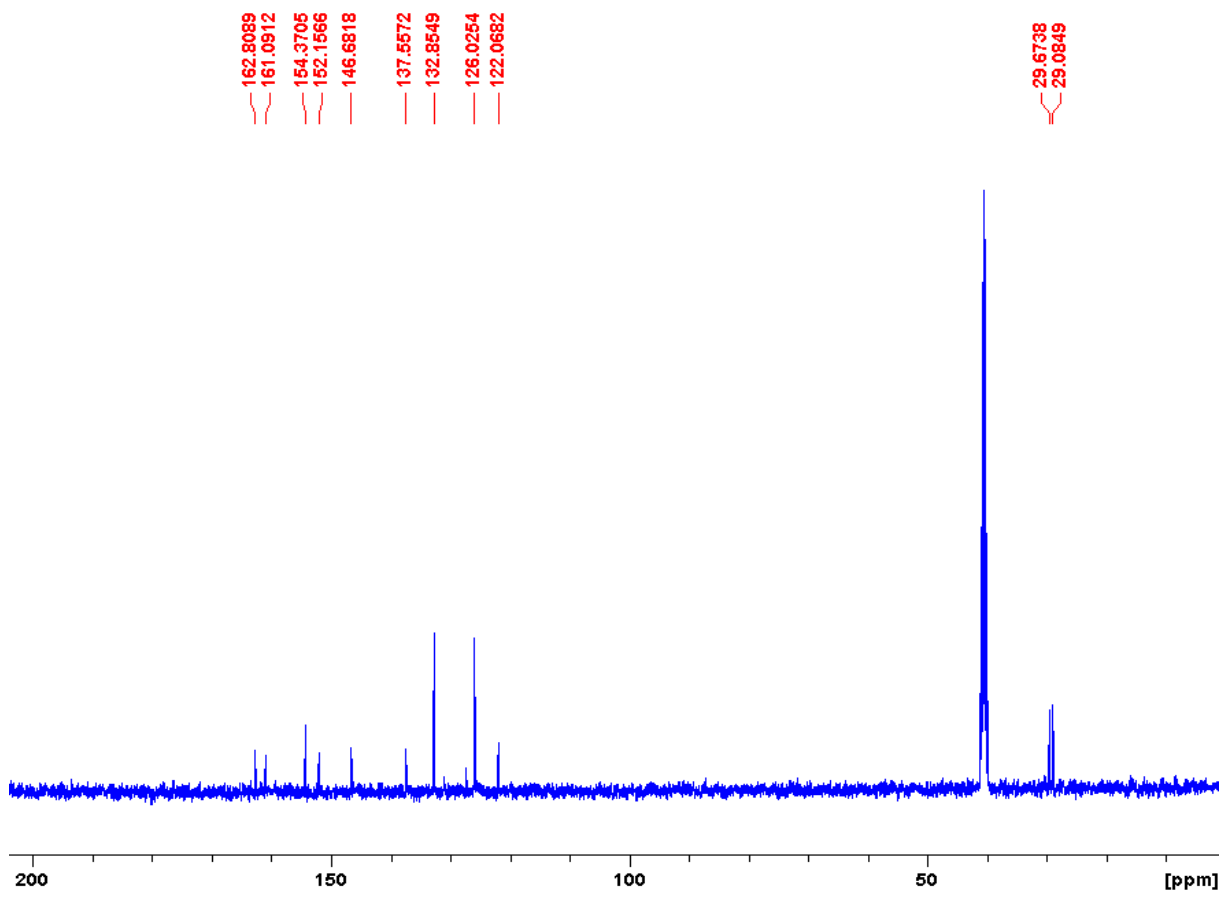

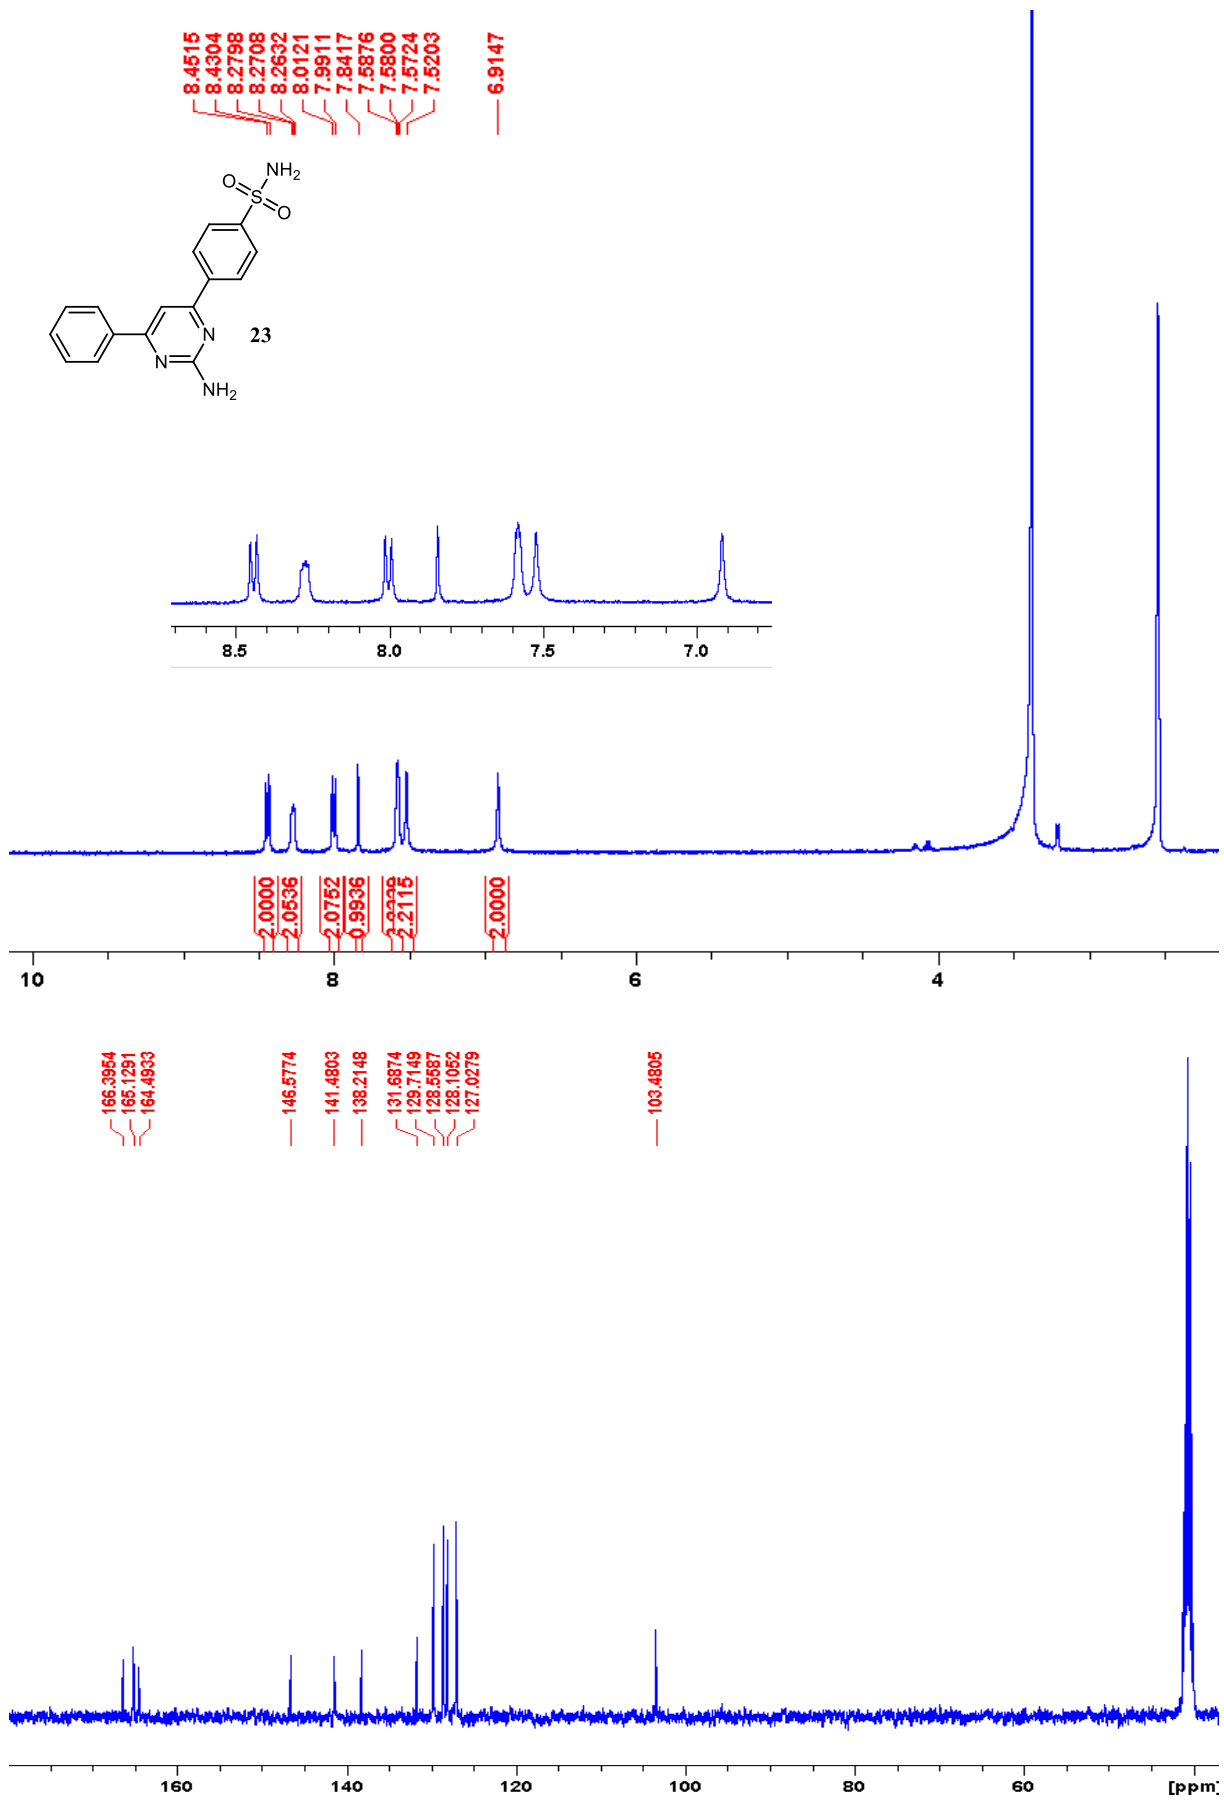

## References

1. Angeli A, Trallori E, Ferraroni M, Di Cesare Mannelli L, Ghelardini C, Supuran CT. Discovery of new 2, 5-disubstituted 1,3-selenazoles as selective human carbonic anhydrase IX inhibitors with potent anti-tumor activity. *Eur J Med Chem*. 2018 Sep 5;157:1214–22.
2. Lin SJ, Tsai WJ, Chiou WF, Yang TH, Yang LM. Selective COX-2 inhibitors. Part 2: Synthesis and biological evaluation of 4-benzylideneamino- and 4-phenyliminomethyl-benzenesulfonamides. *Bioorg Med Chem*. 2008 Mar 1;16(5):2697–706.
3. Motika SE, Ulrich RJ, Geddes EJ, Lee HY, Lau GW, Hergenrother PJ. Gram-Negative Antibiotic Active Through Inhibition of an Essential Riboswitch. *J Am Chem Soc*. 2020 Jun 17;142(24):10856–62.
4. Herschhorn A, Lerman L, Weitman M, Gleenberg IO, Nudelman A, Hizi A. De Novo Parallel Design, Synthesis and Evaluation of Inhibitors against the Reverse Transcriptase of Human Immunodeficiency Virus Type-1 and Drug-Resistant Variants. *J Med Chem*. 2007 May 1;50(10):2370–84.
5. Varga L, Nagy T, Kövesdi I, Benet-Buchholz J, Dormán G, Üрге L, et al. Solution-phase parallel synthesis of 4,6-diaryl-pyrimidine-2-ylamines and 2-amino-5,5-disubstituted-3,5-dihydroimidazol-4-ones via a rearrangement. *Tetrahedron*. 2003 Jan 27;59(5):655–62.
